# Supplementary material for: Discovery of 2-(4-Substituted-piperidin/piperazine-1-yl)-N-(5-cyclopropyl-1H-pyrazol-3-yl)-quinazoline-2,4-diamines as PAK4 Inhibitors with Potent A549 Cell Proliferation, Migration, and Invasion Inhibition Activity
Source: PubMed Central journal article supplement (PMC6100240; doi:10.3390/molecules23020417), 2018-02-14

# Discovery of 2-(4-Substituted-piperidin/piperazine-1-yl)-N-(5-cyclopropyl-1H-pyrazol-3-yl)-Quinazoline-2,4-Diamines as PAK4 Inhibitors that Showed Potent A549 Cell Proliferation, Migration, and Invasion Inhibition

Tianxiao Wu, Yu Pang, Jing Guo, Wenbo Yin, Mingyue Zhu, Chenzhou Hao, Kai Wang, Jian Wang, Dongmei Zhao\*, Maosheng Cheng

Key Laboratory of Structure-Based Drug Design & Discovery of Ministry of Education, Shenyang Pharmaceutical University, Shenyang 110016, China; 15330802221@163.com (T. W.); [pangyu038@163.com](mailto:pangyu038@163.com) (Y. P.); [guojingspu@163.com](mailto:guojingspu@163.com) (J. G.); [yinwenbo1994@163.com](mailto:yinwenbo1994@163.com) (W. Y.); [13555832736@163.com](mailto:13555832736@163.com) (M. Z.); [spuhcz@163.com](mailto:spuhcz@163.com) (C. H.); [15702442831@163.com](mailto:15702442831@163.com) (K. W.); [jianwang@email.com](mailto:jianwang@email.com) (J. W.); [mscheng@263.net](mailto:mscheng@263.net) (M. C.).

\* Correspondence: [medchemzhao@163.com](mailto:medchemzhao@163.com); Tel.: +86-24-4352-0219

**Content:** <sup>1</sup>H NMR, <sup>13</sup>C NMR, HRMS for all target compounds reported in this study.

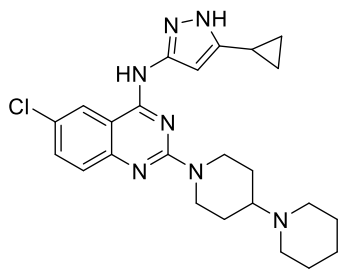

Compound 6a

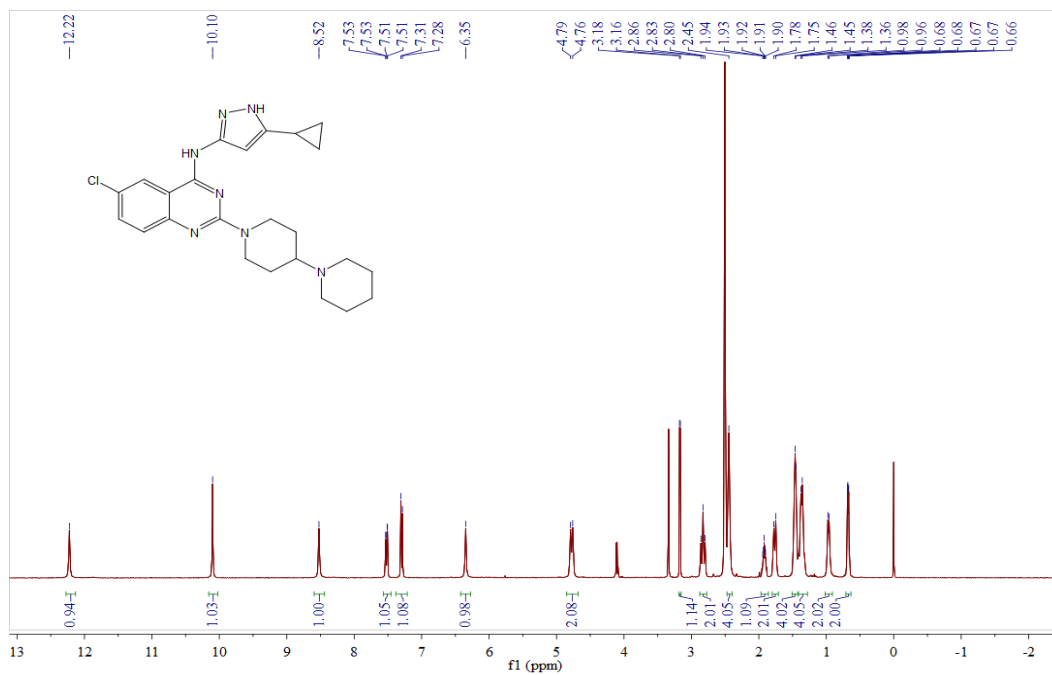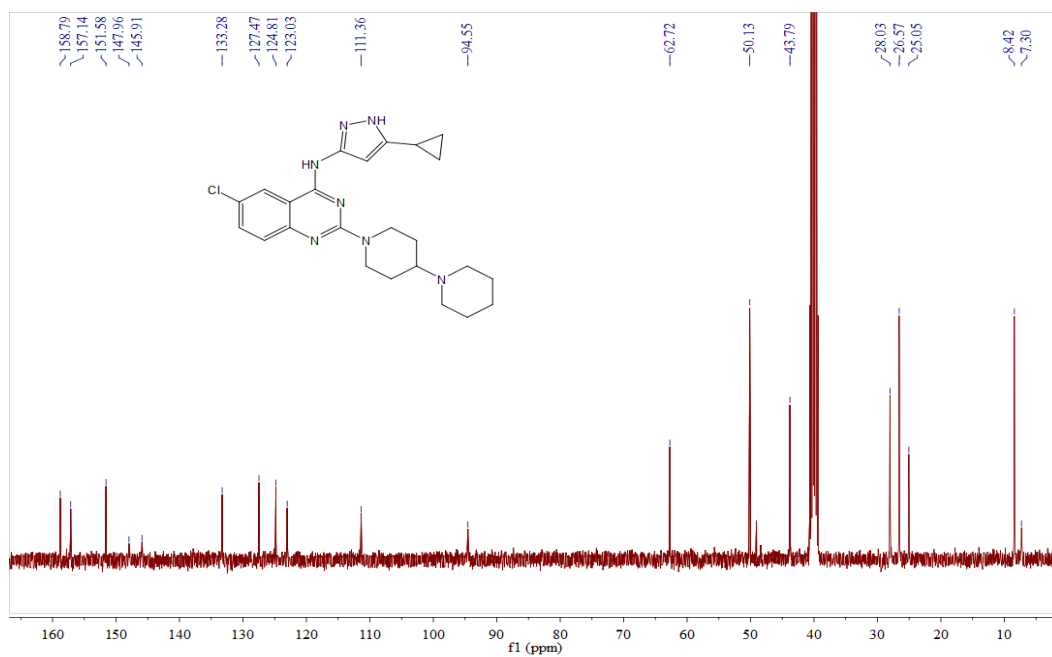

## User Spectra

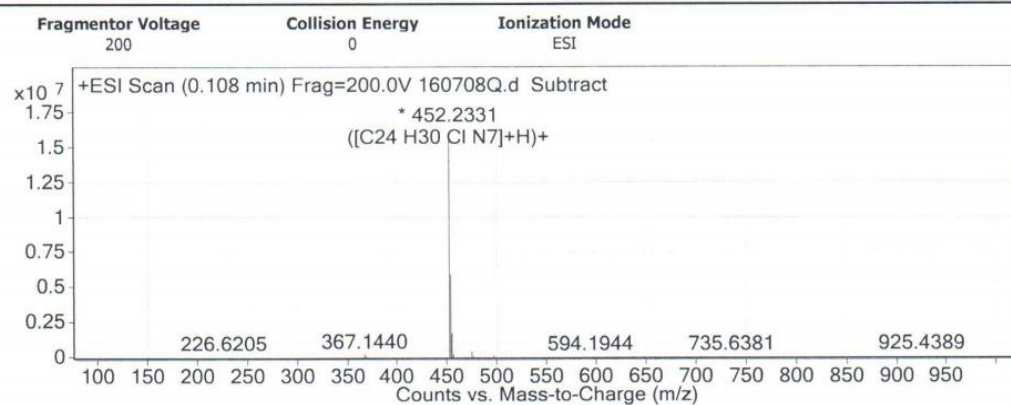

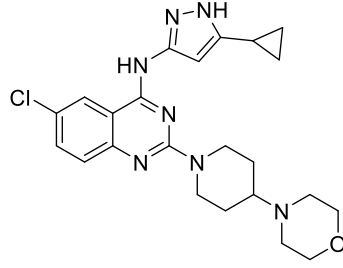

Compound **6b**

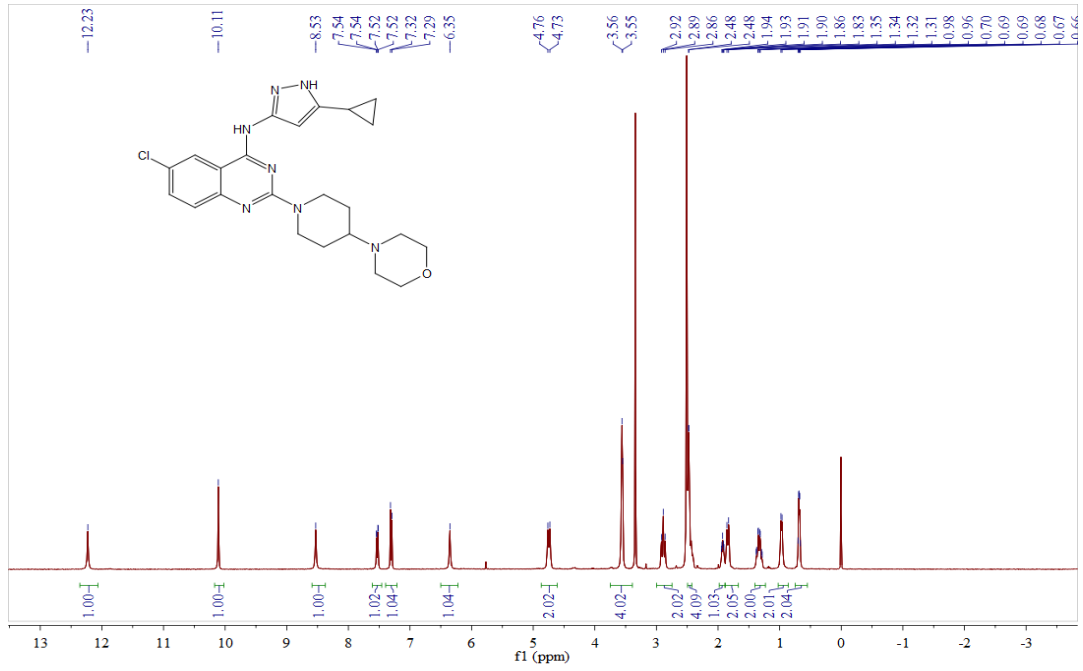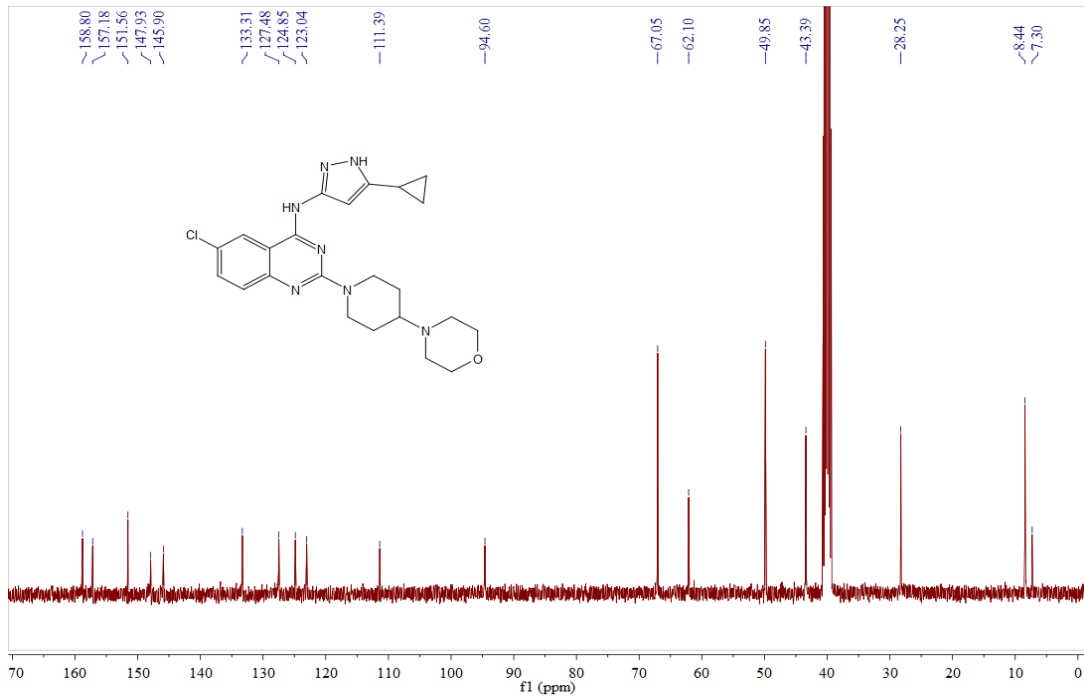

## User Spectra

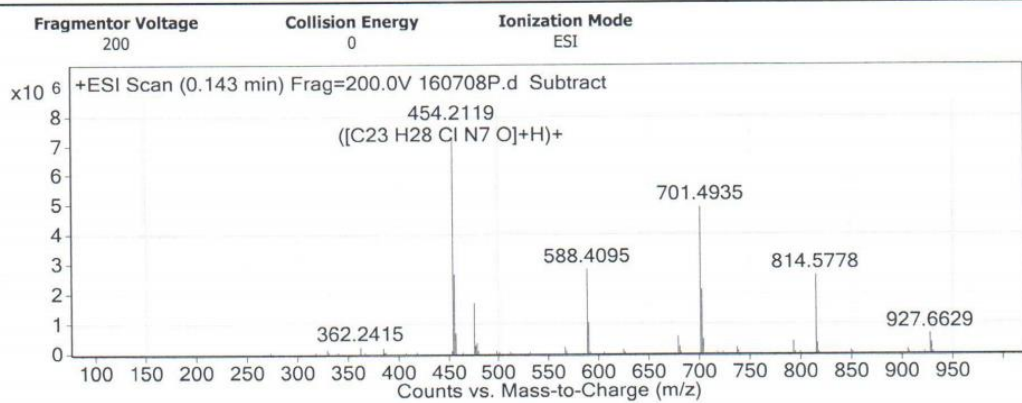

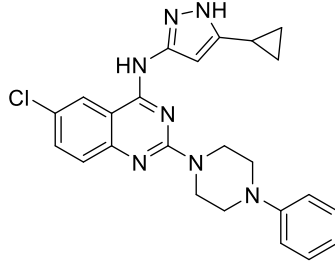

Compound 7a

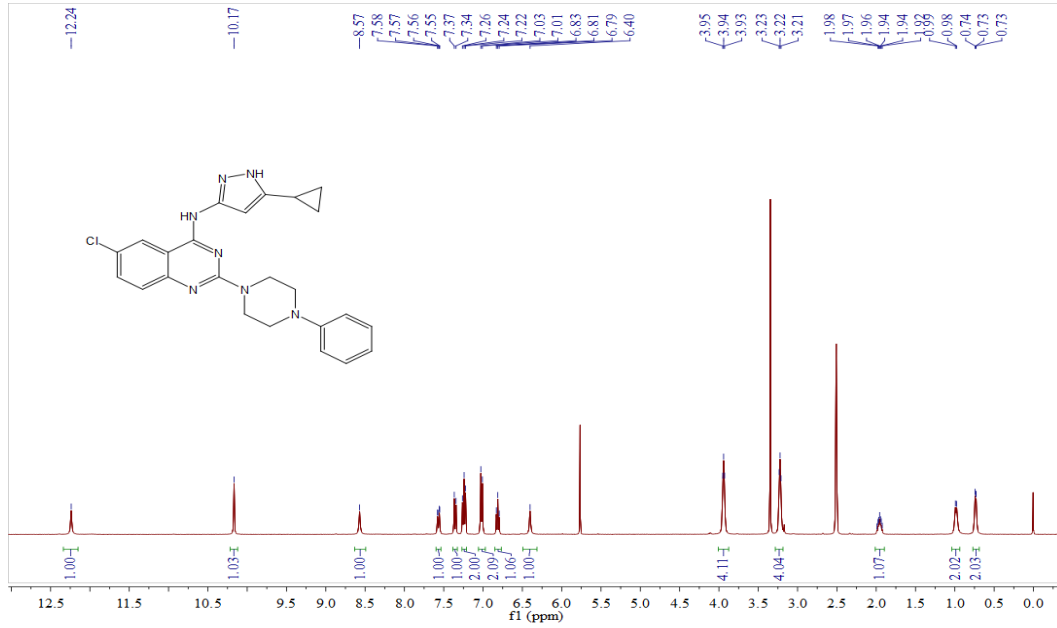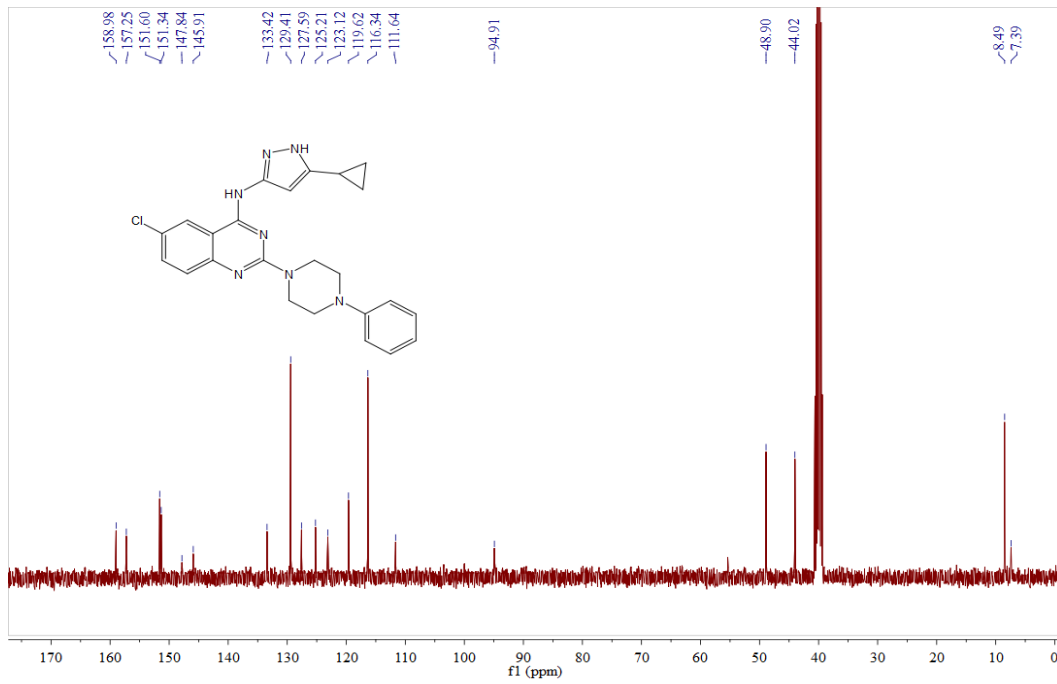

## User Spectra

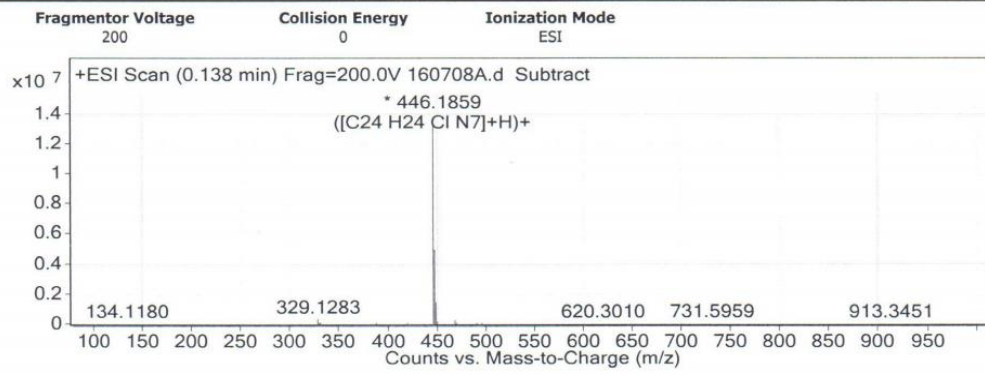

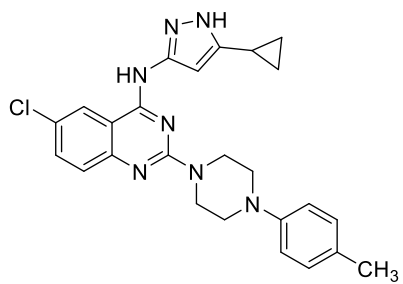

Compound 7b

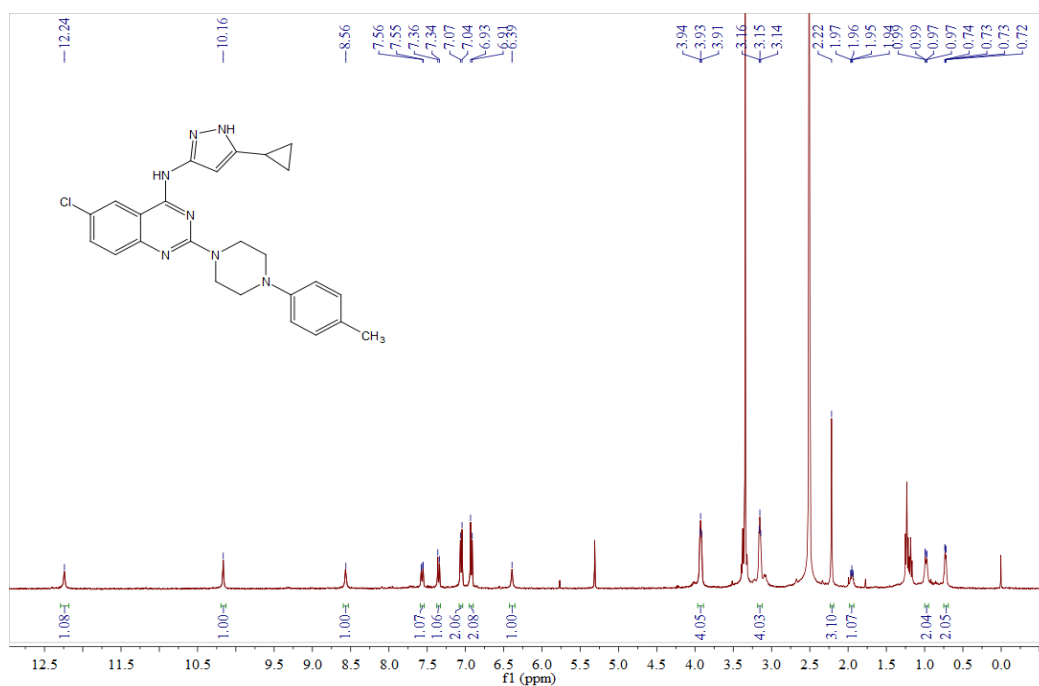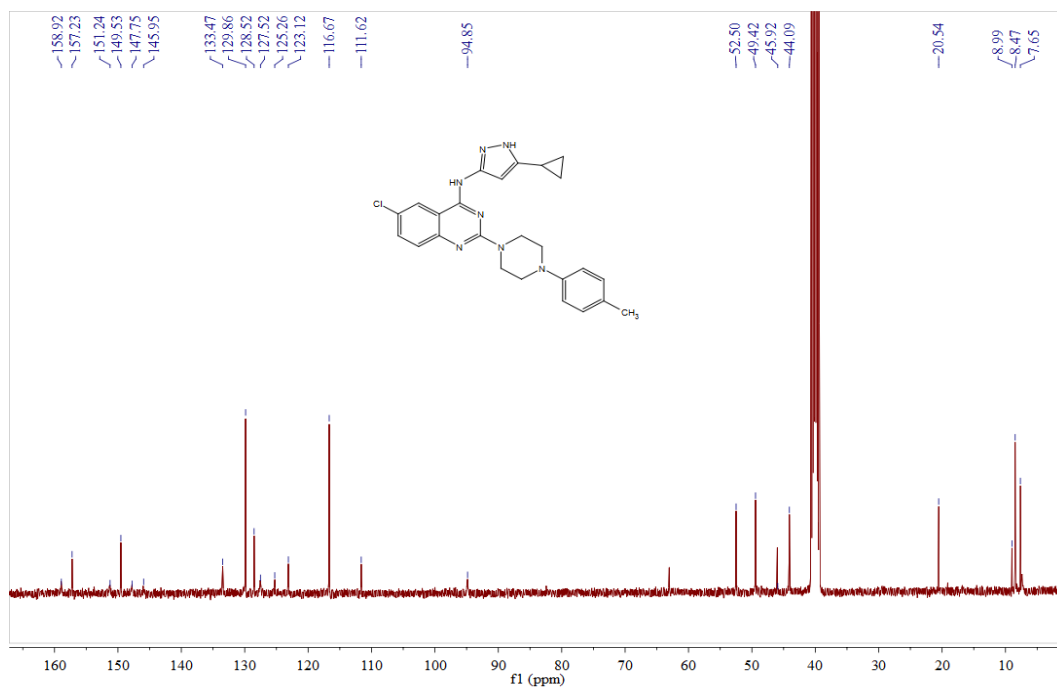



## User Spectra

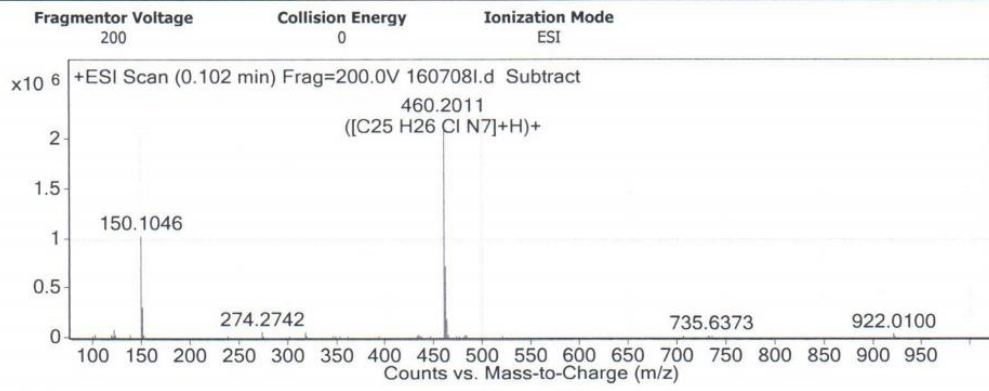

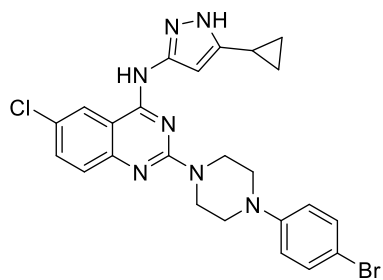

Compound 7c

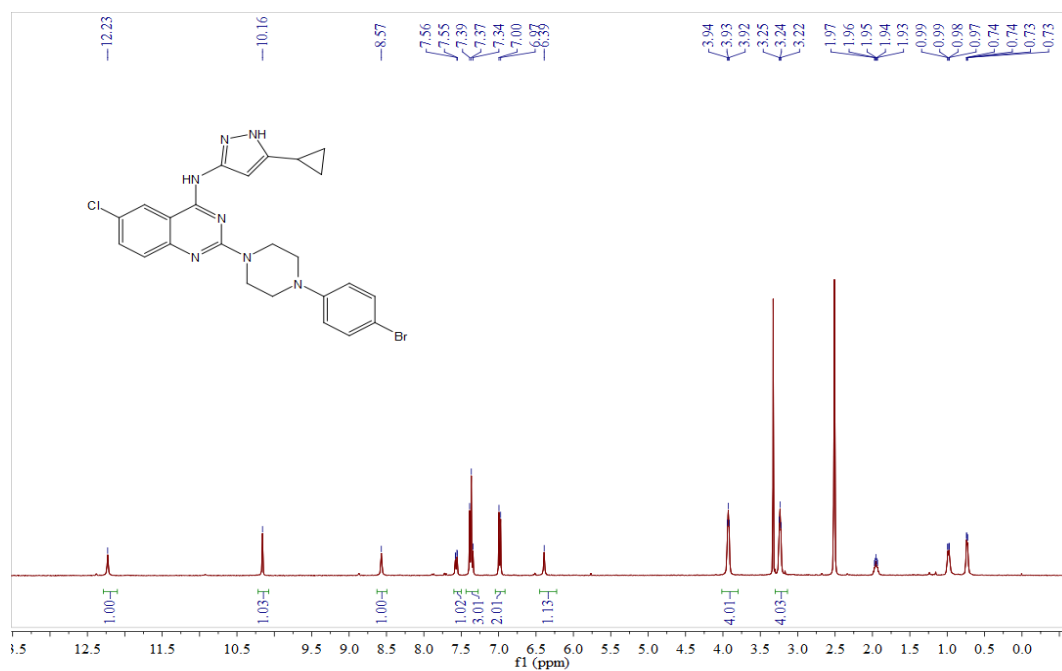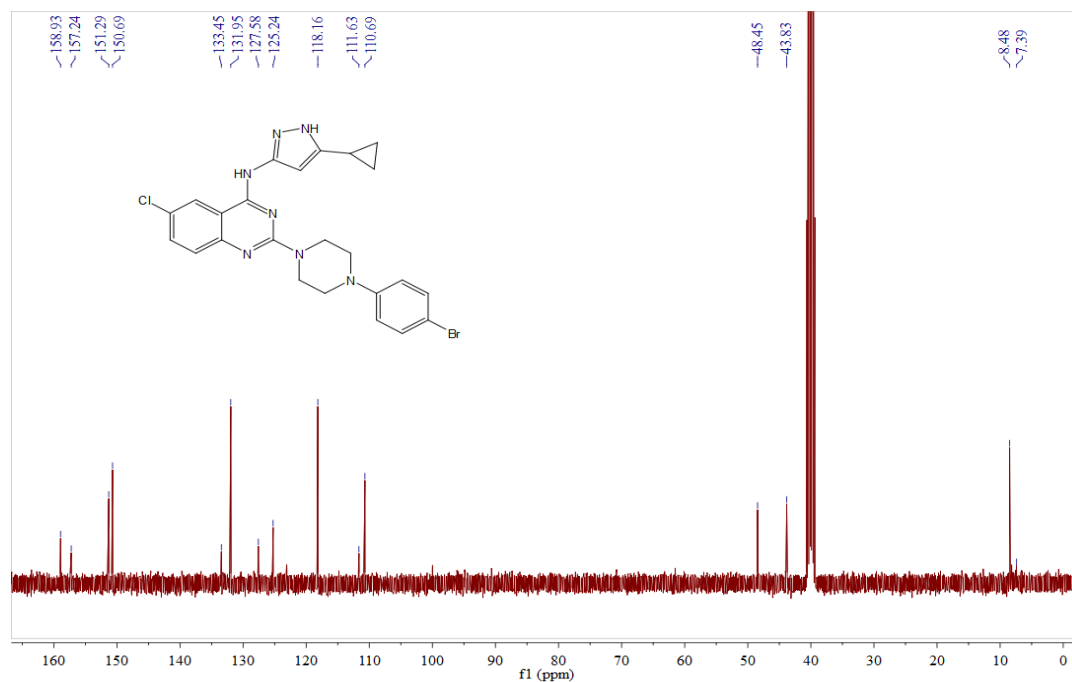

## User Spectra

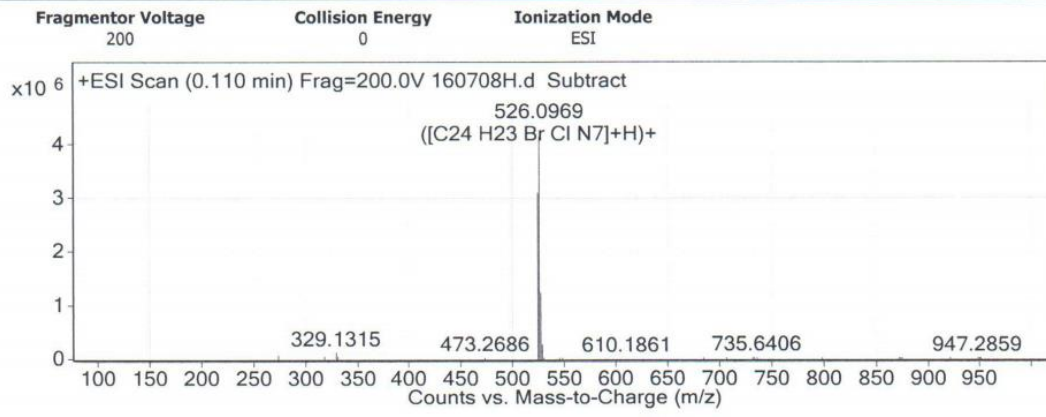

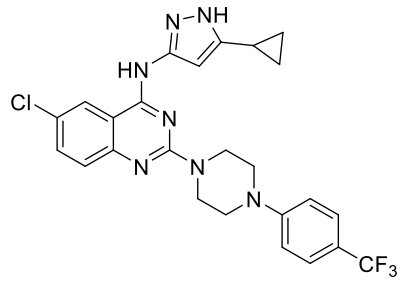

Compound 7d

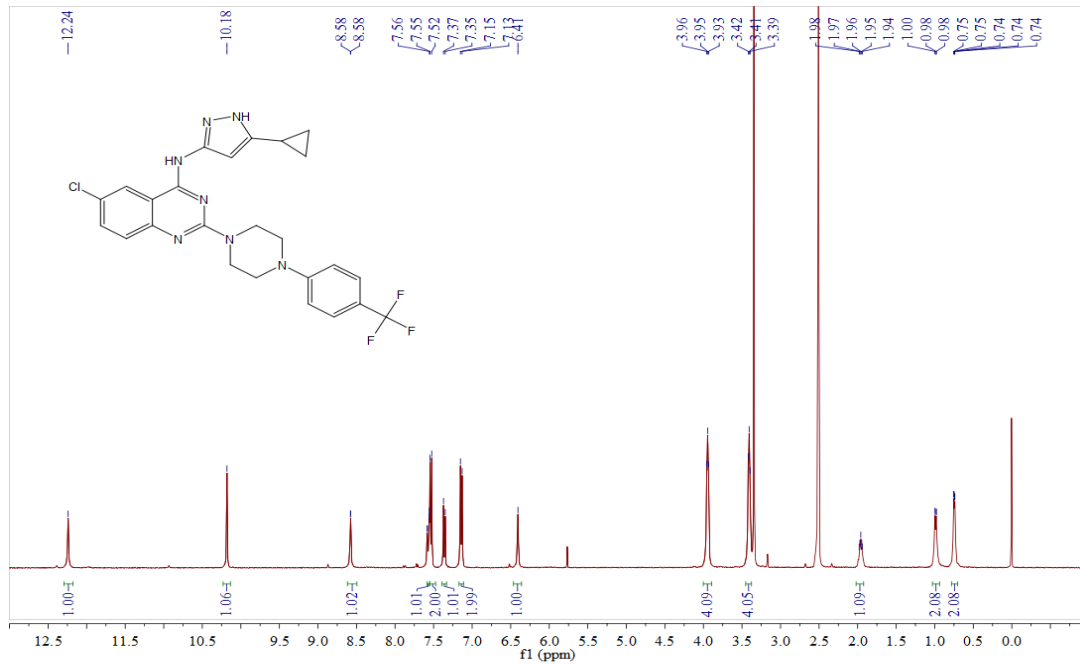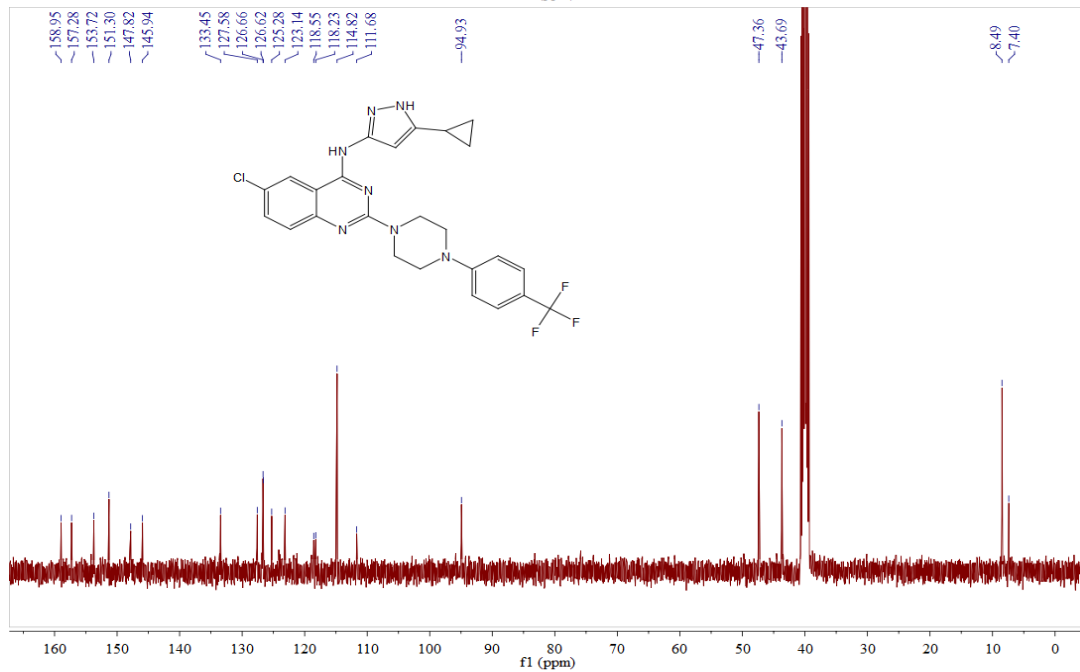

## User Spectra

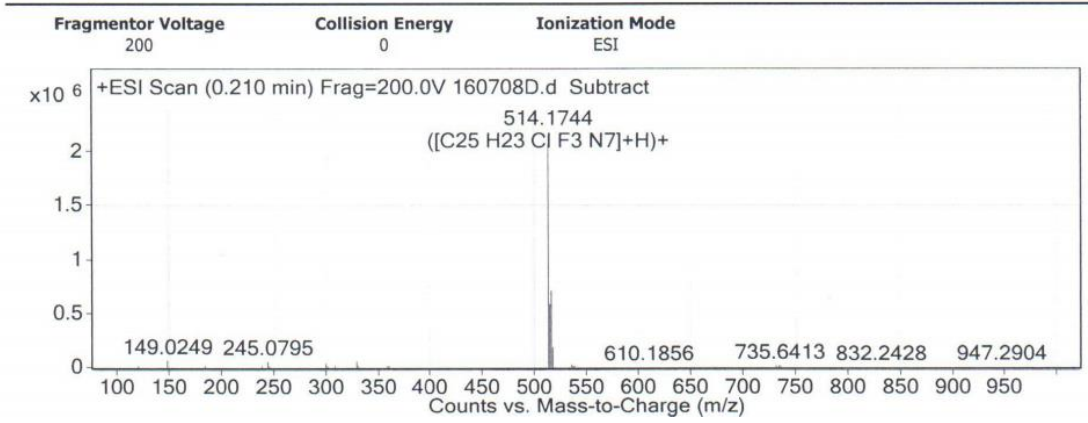

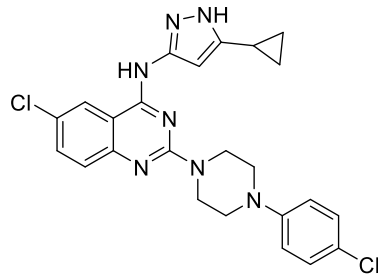

Compound 7e

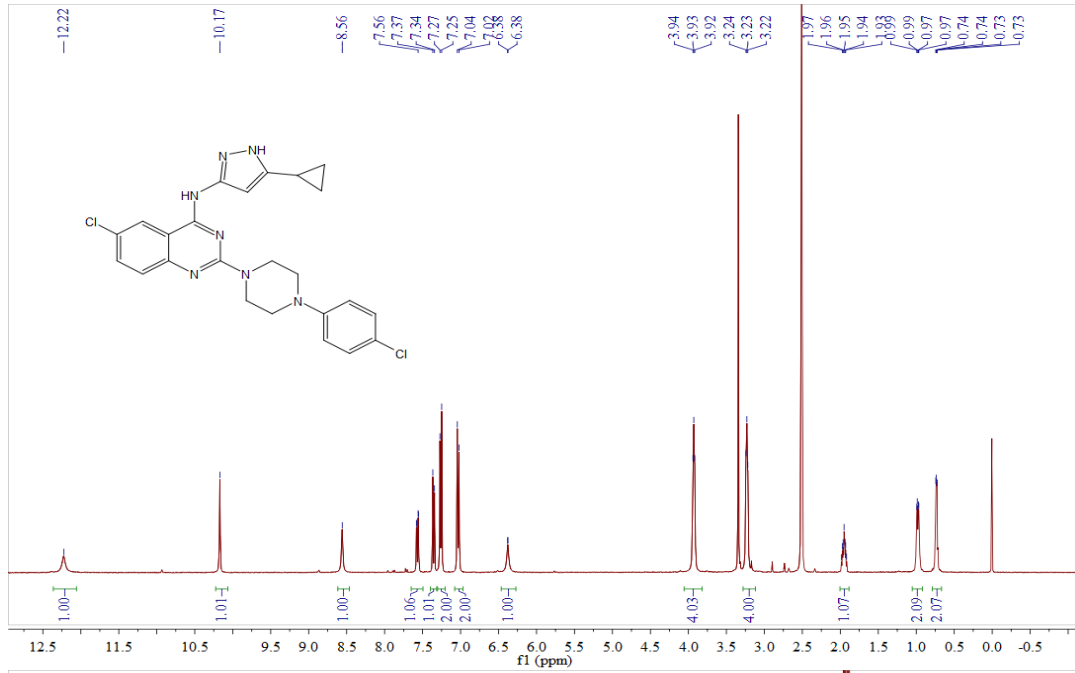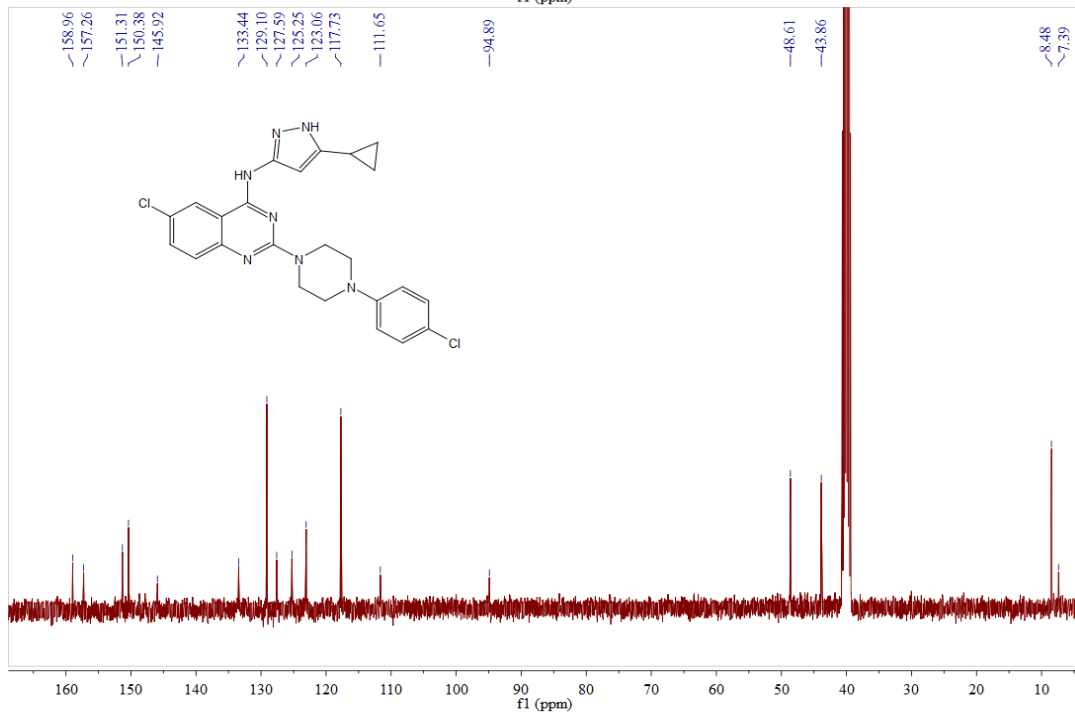

## User Spectra

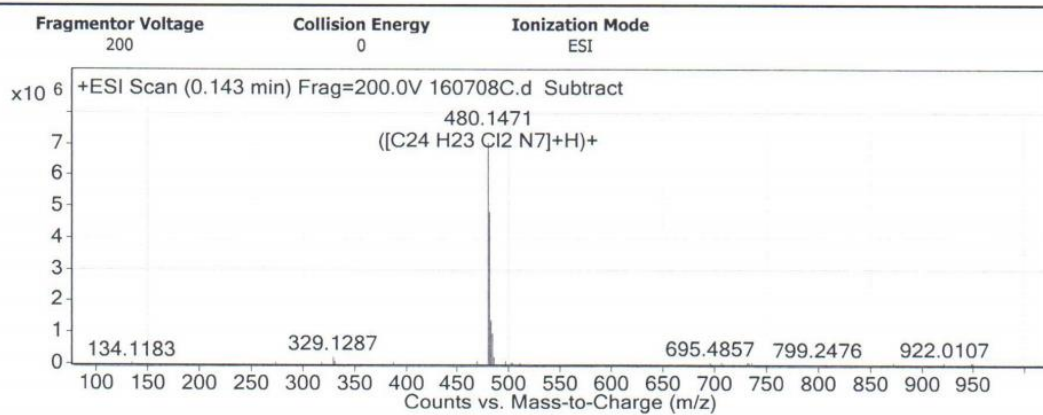

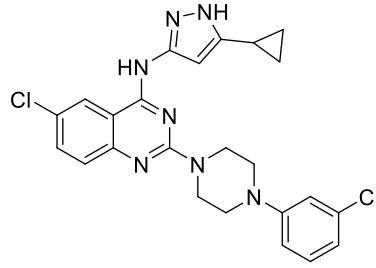

Compound **7f**

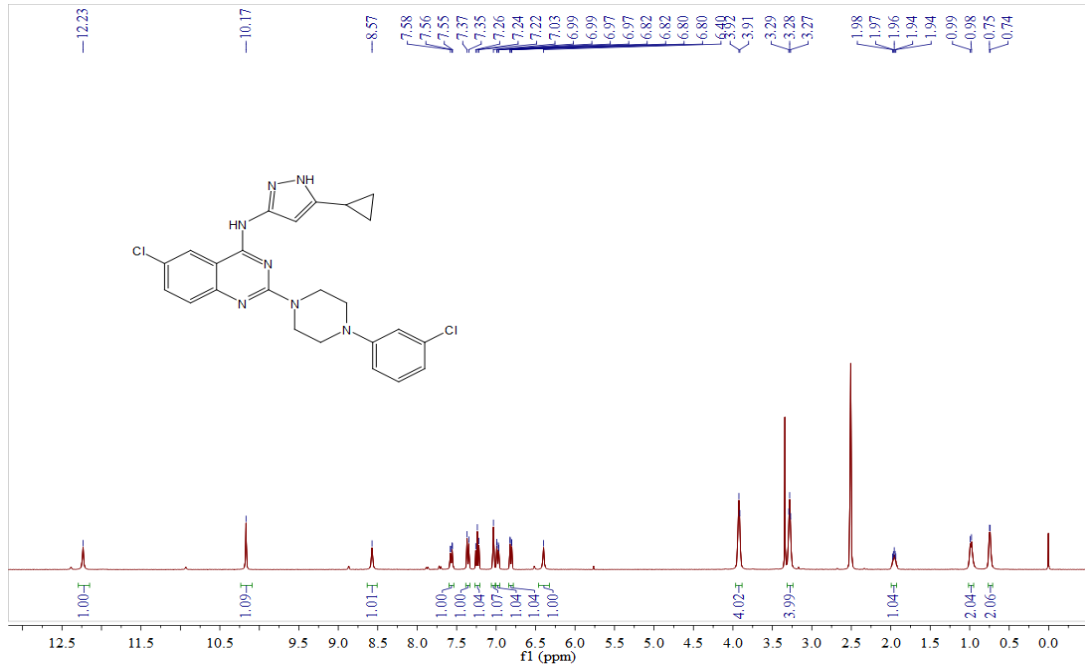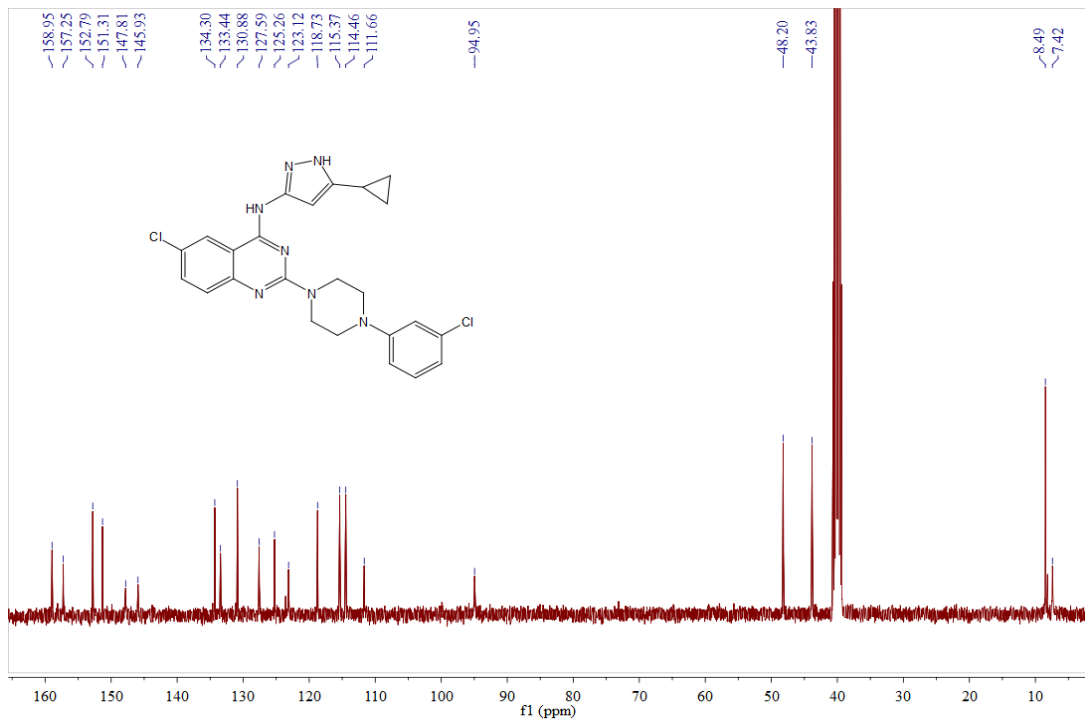



# User Spectra

Fragmentor Voltage: 200  
Collision Energy: 0  
Ionization Mode: ESI

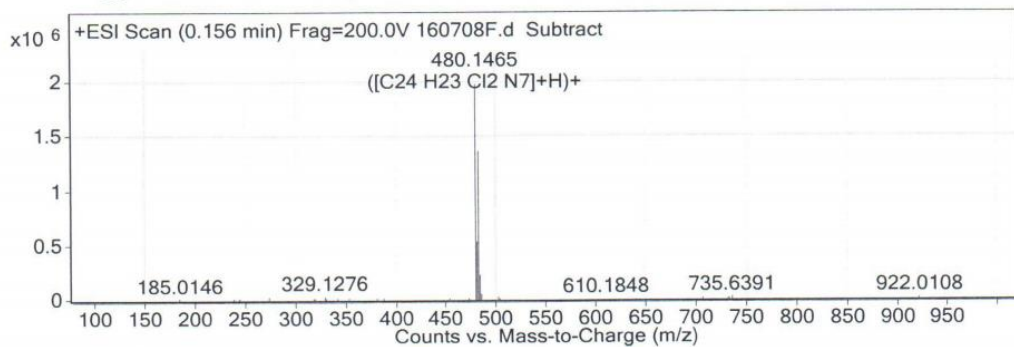

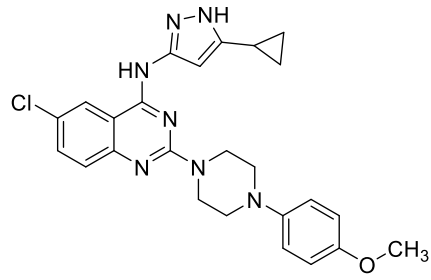

Compound **7g**

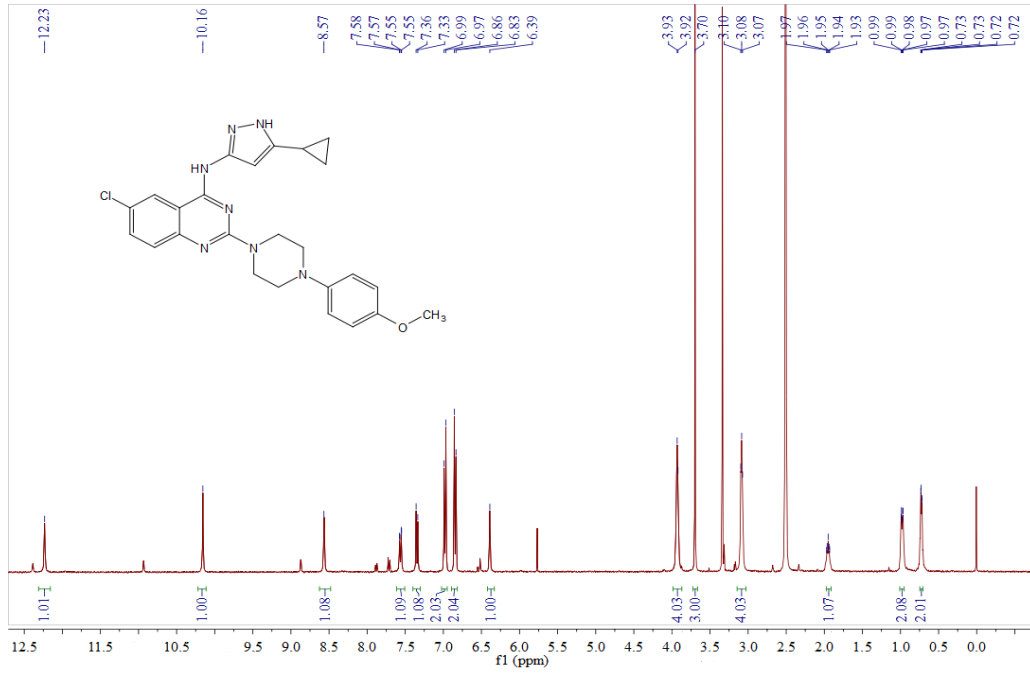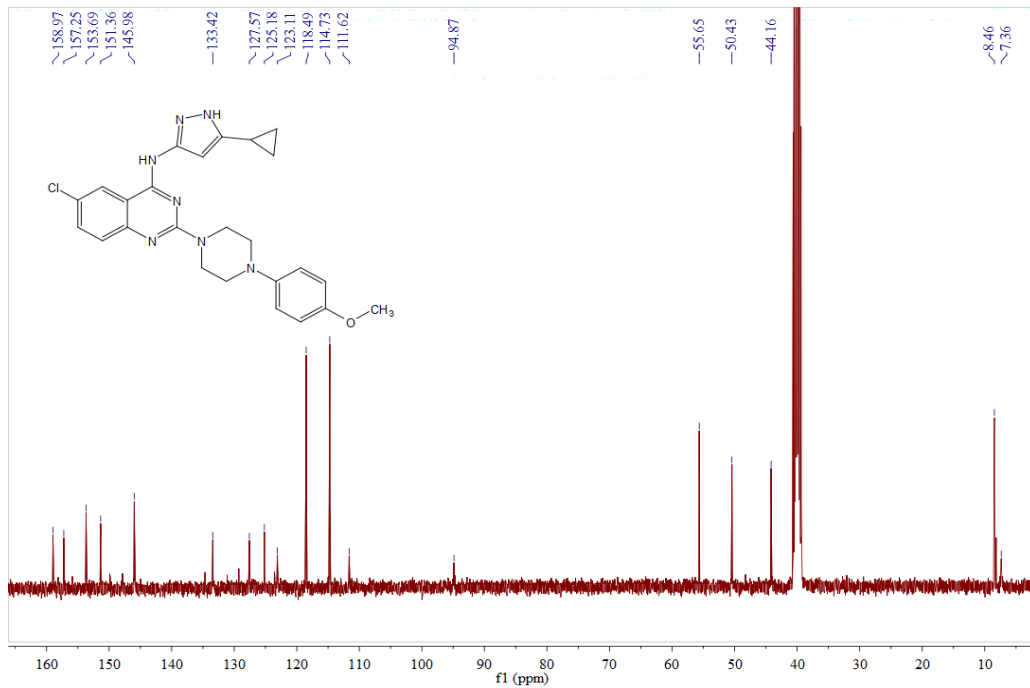

## User Spectra

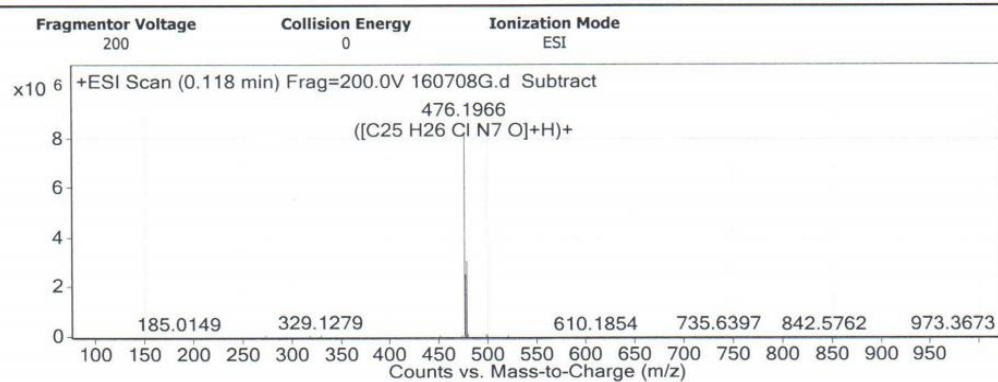

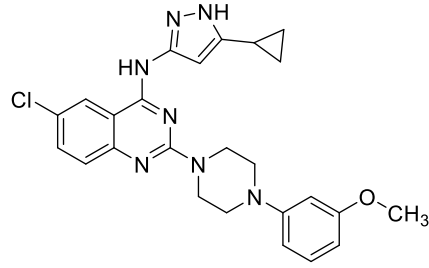

Compound 7h

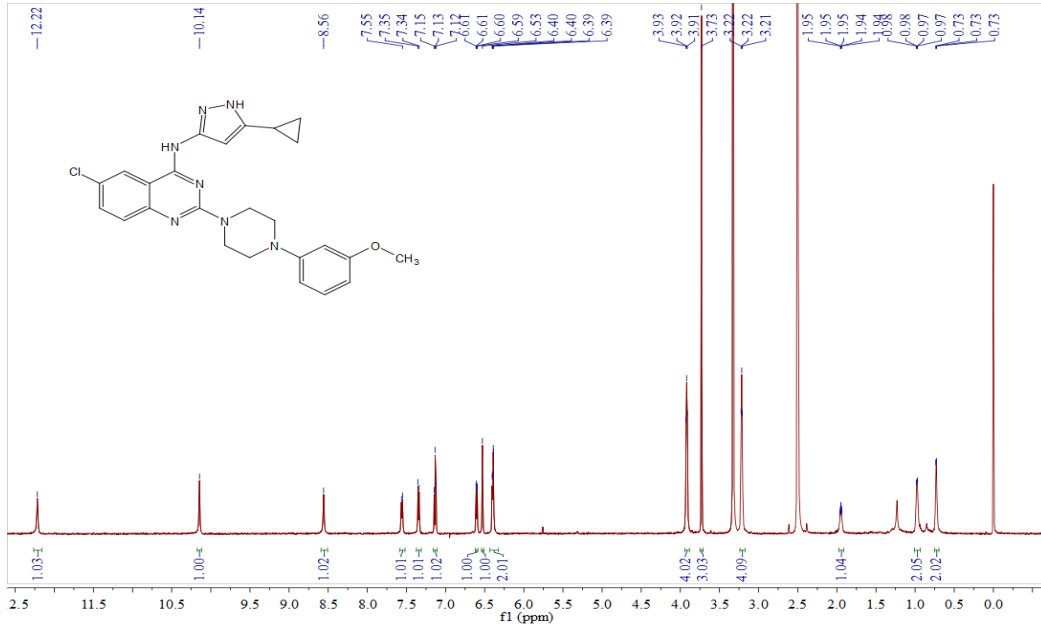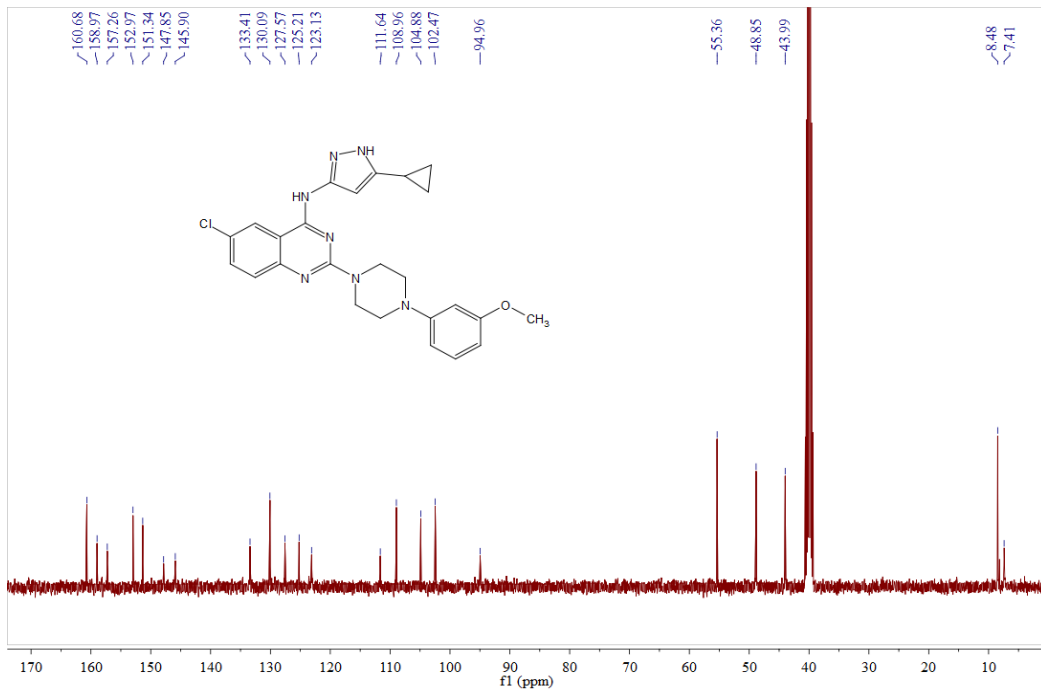

## User Spectra

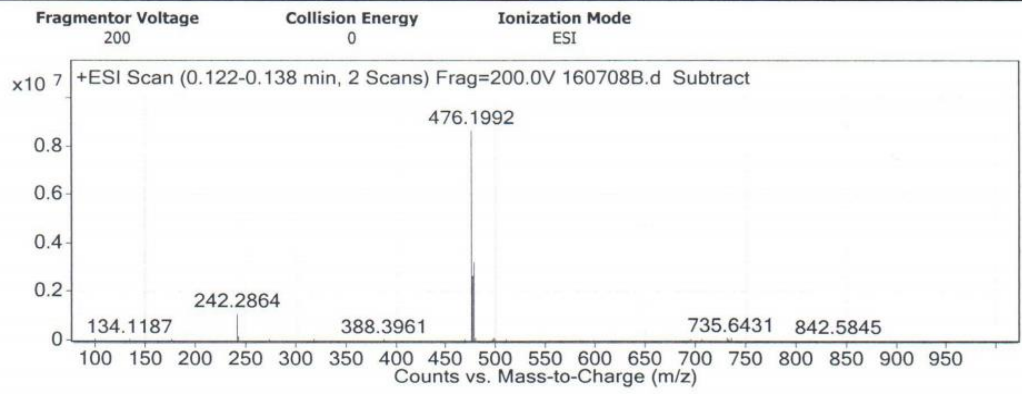

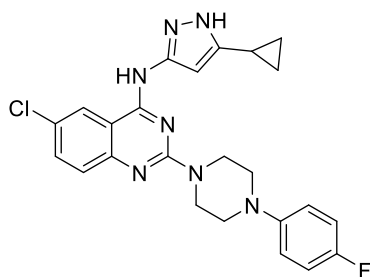

Compound 7i

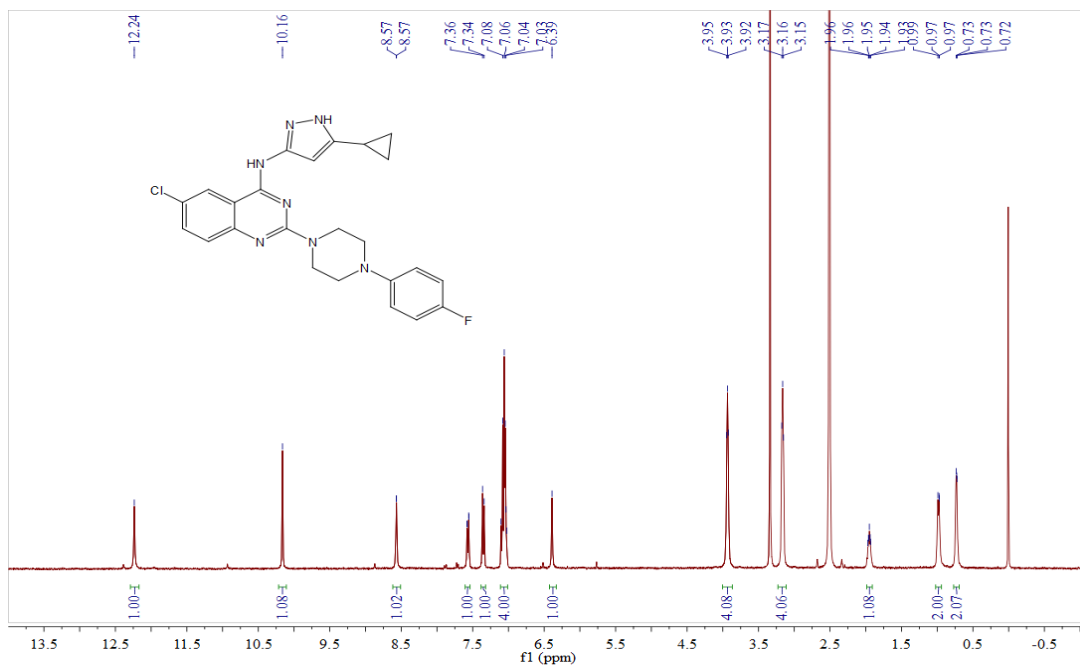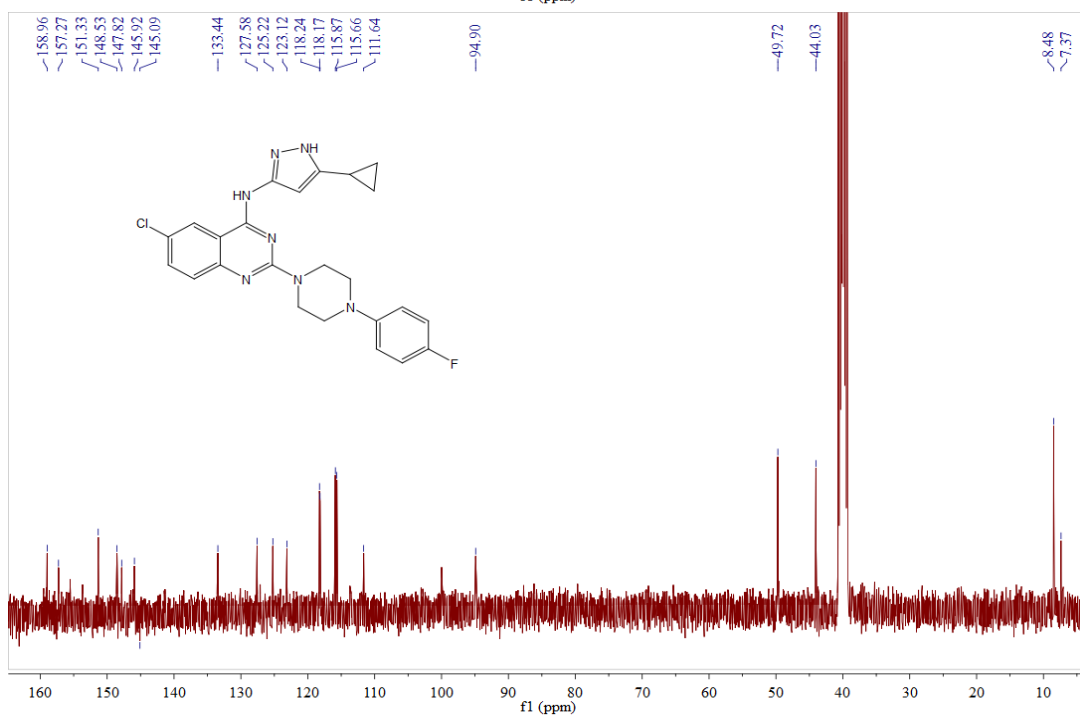

## User Spectra

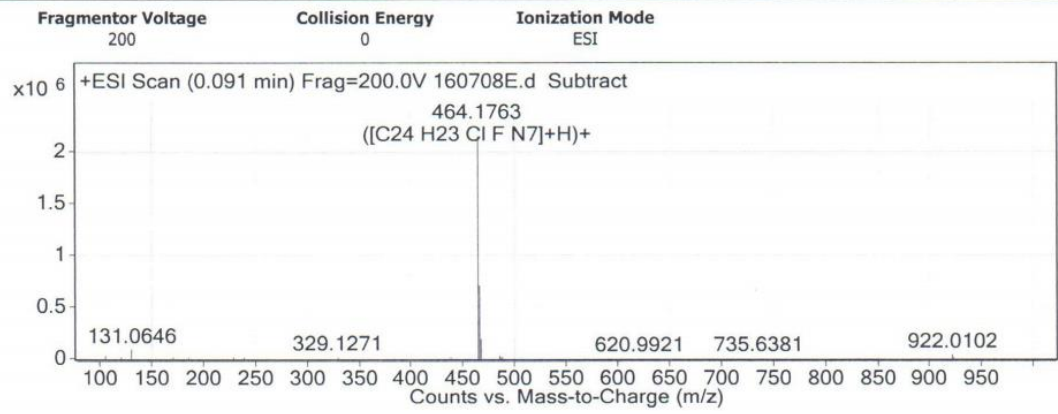

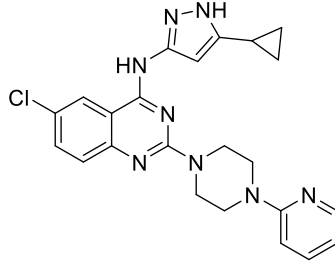

Compound 8a

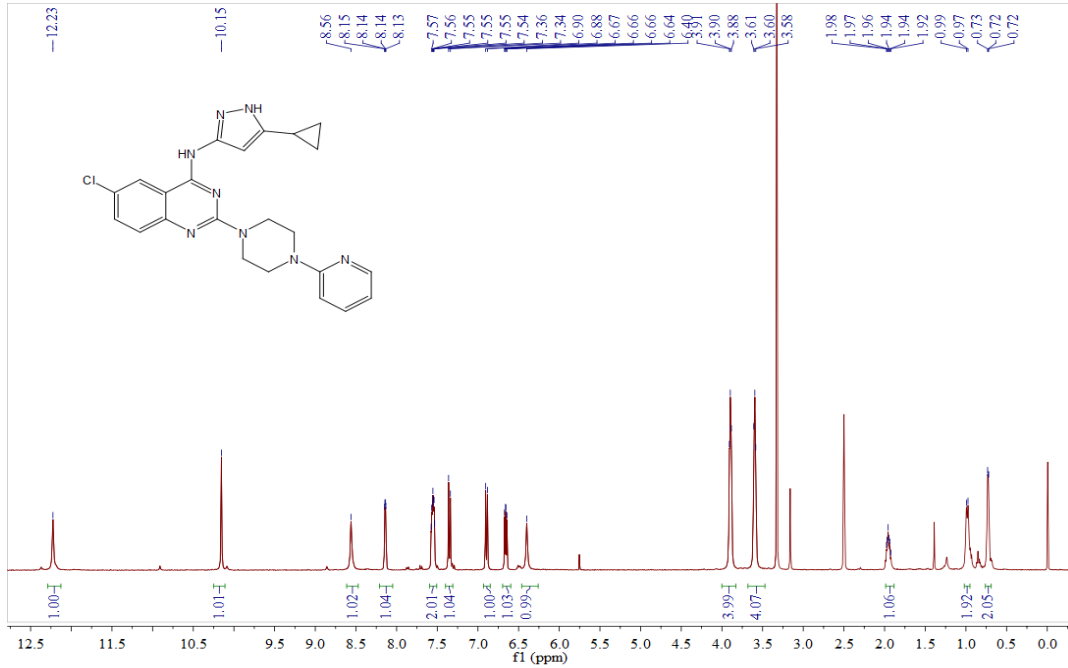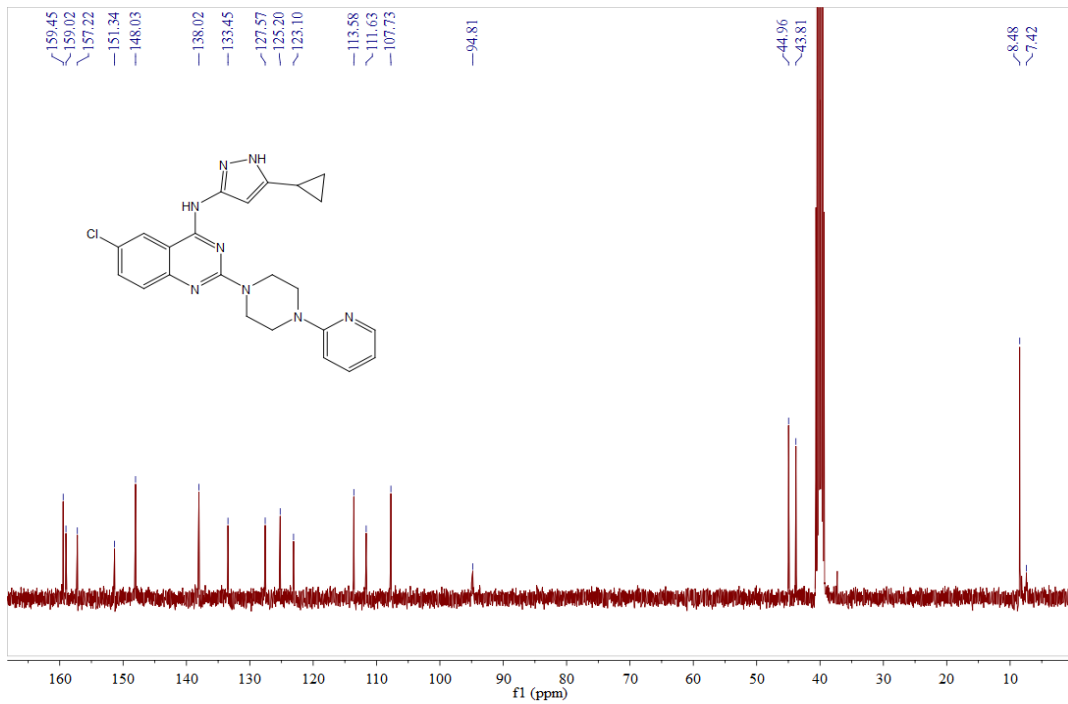



## User Spectra

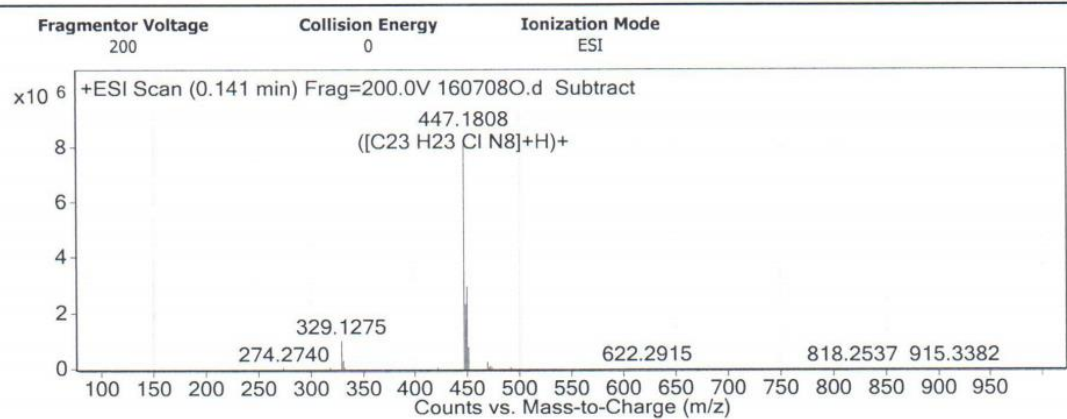

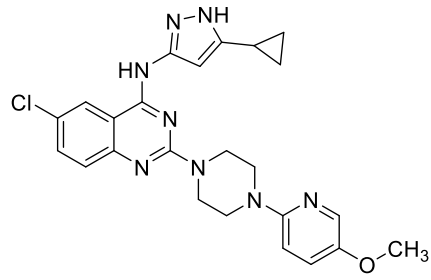

Compound **8b**

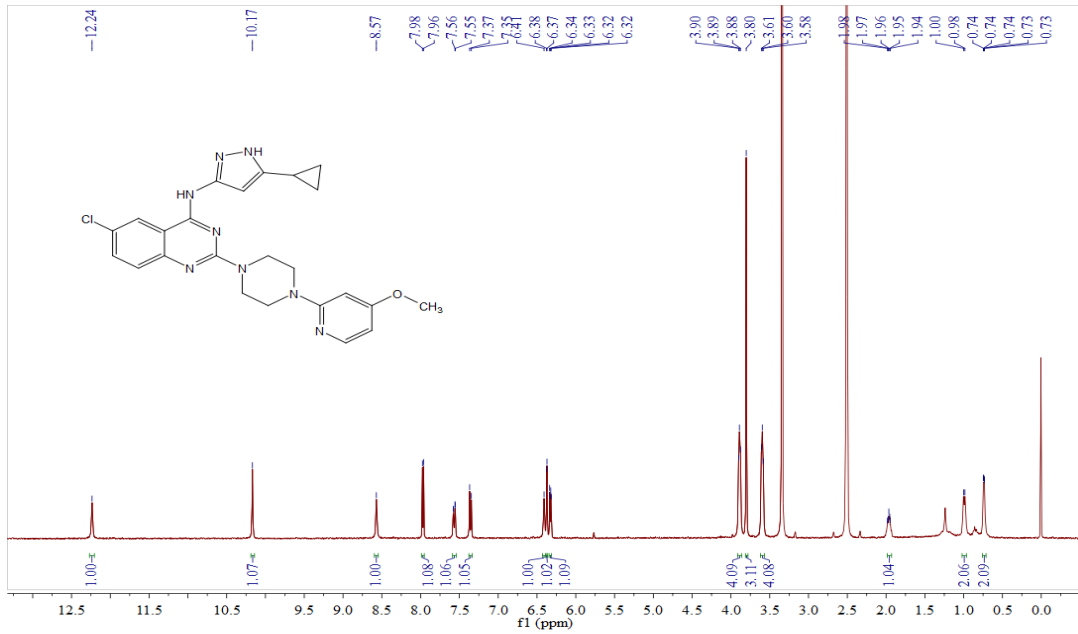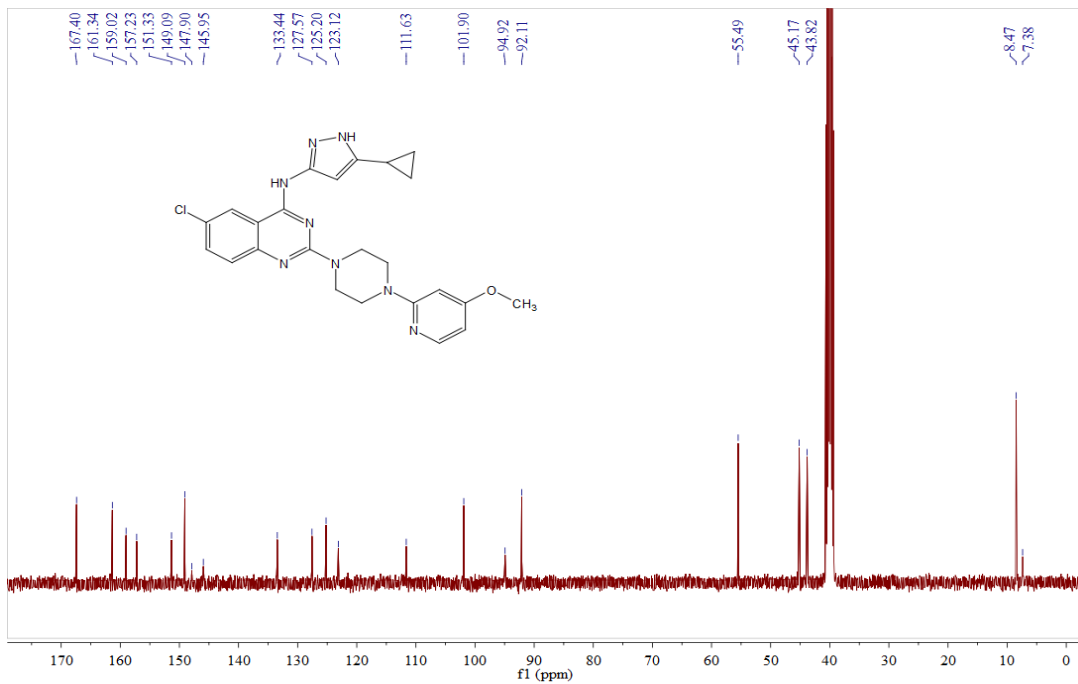

# User Spectra

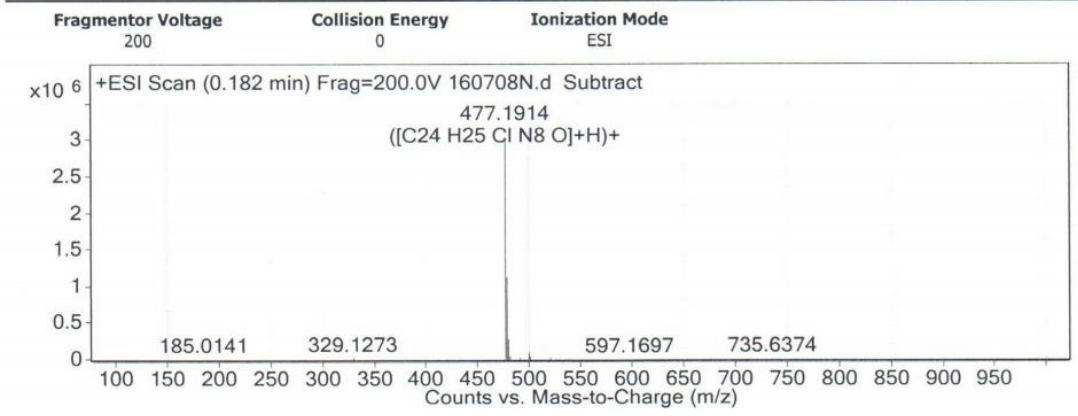

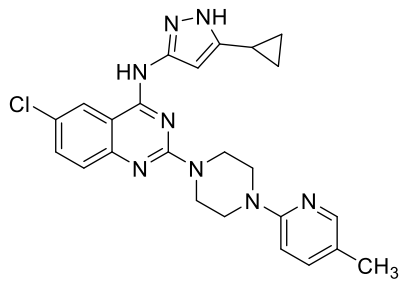

Compound **8c**

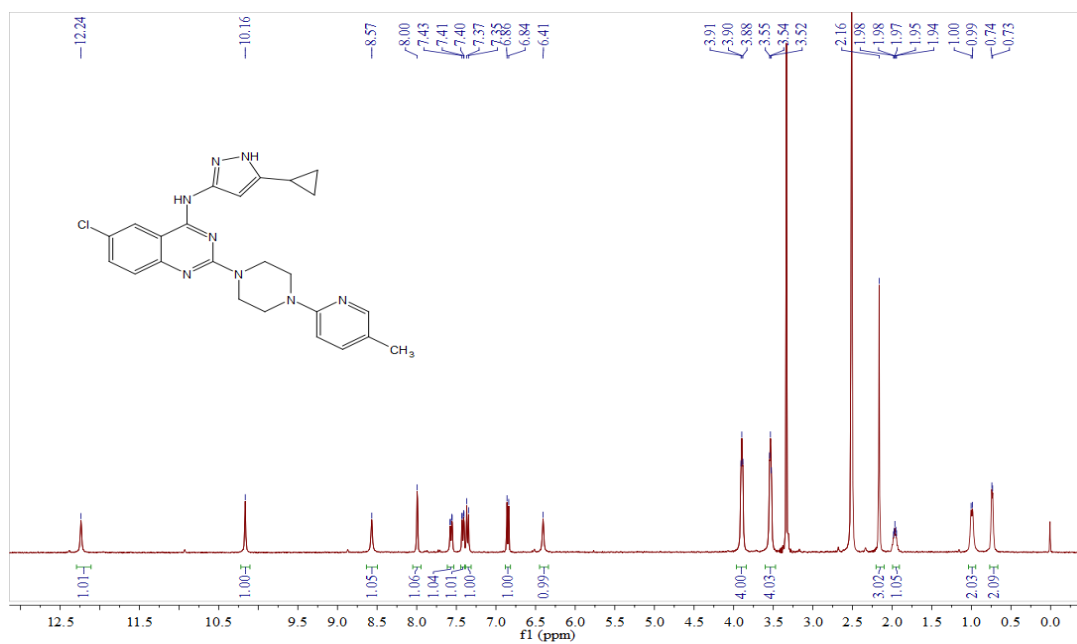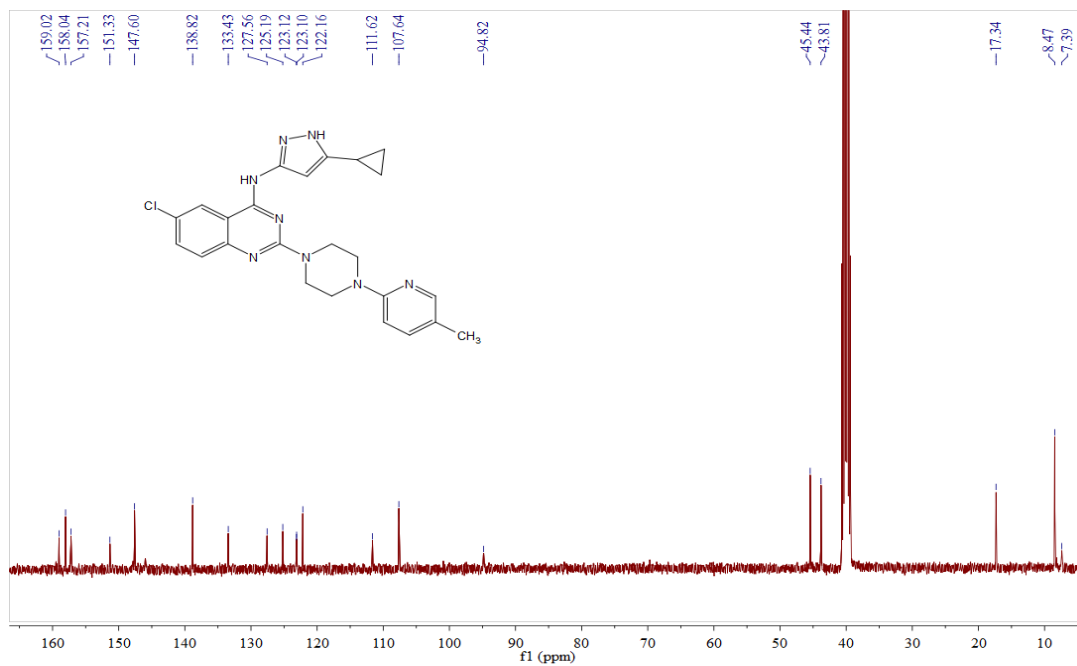

## User Spectra

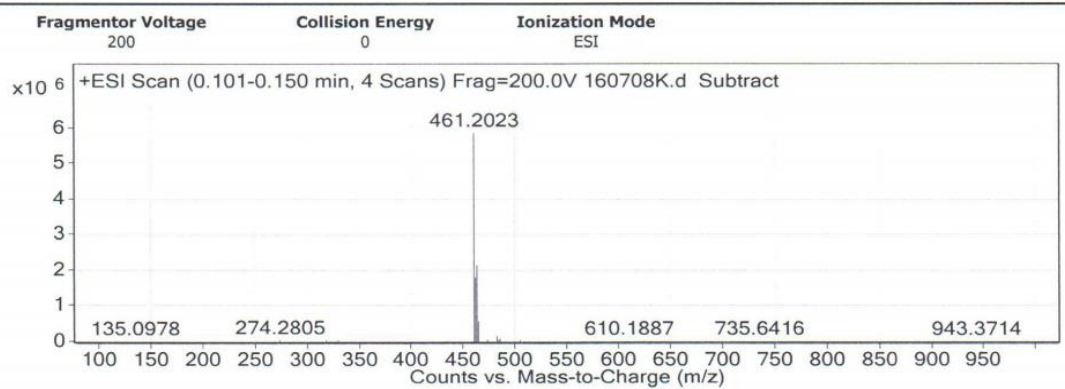

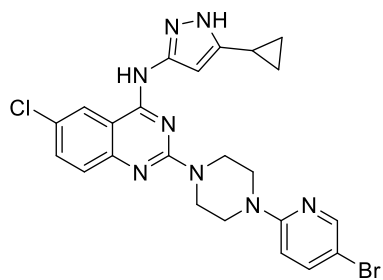

Compound 8d

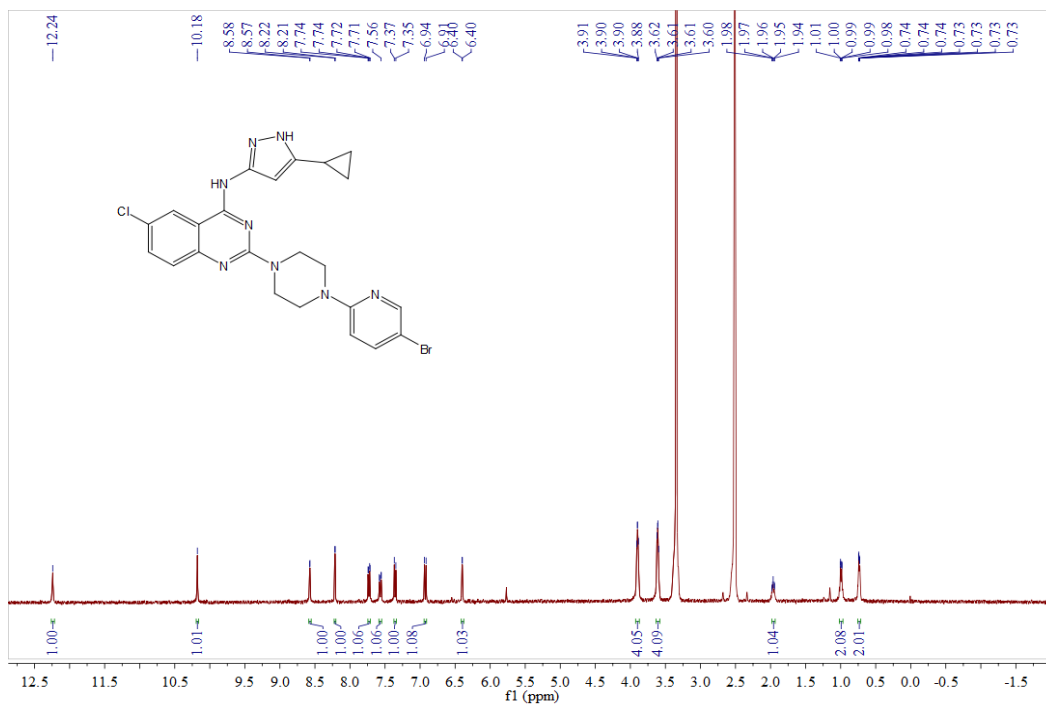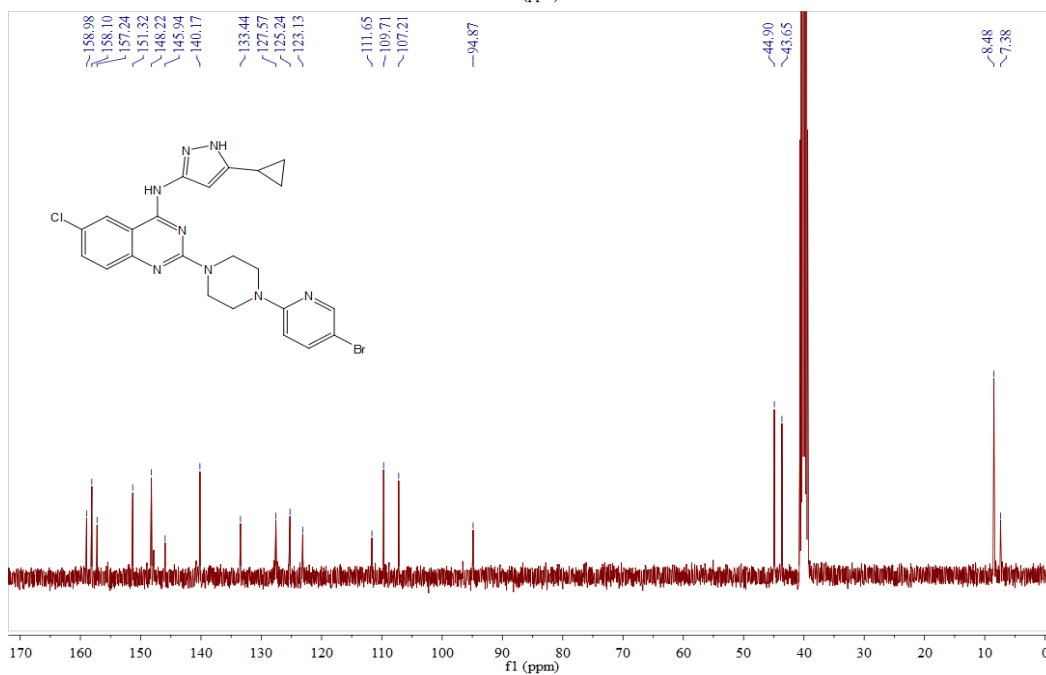

## User Spectra

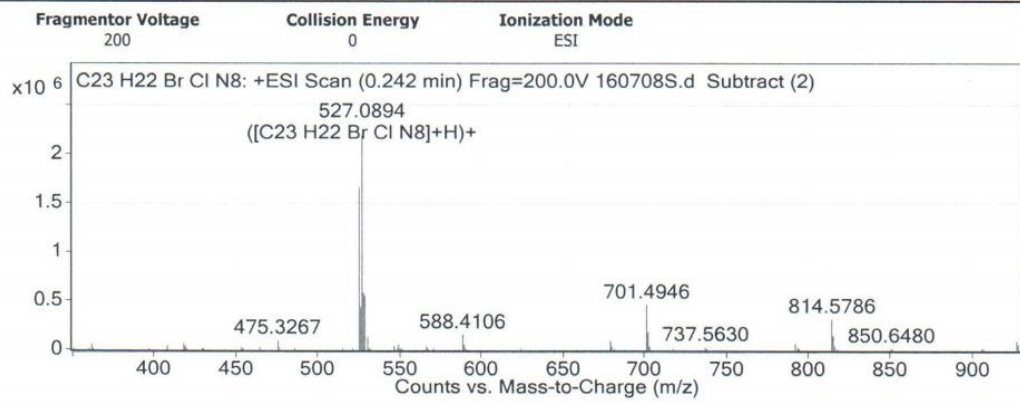

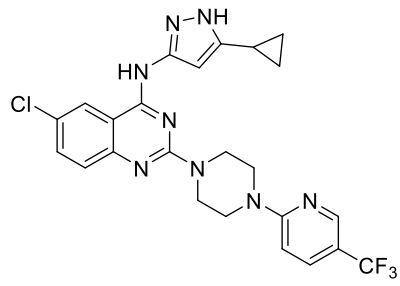

Compound **8e**

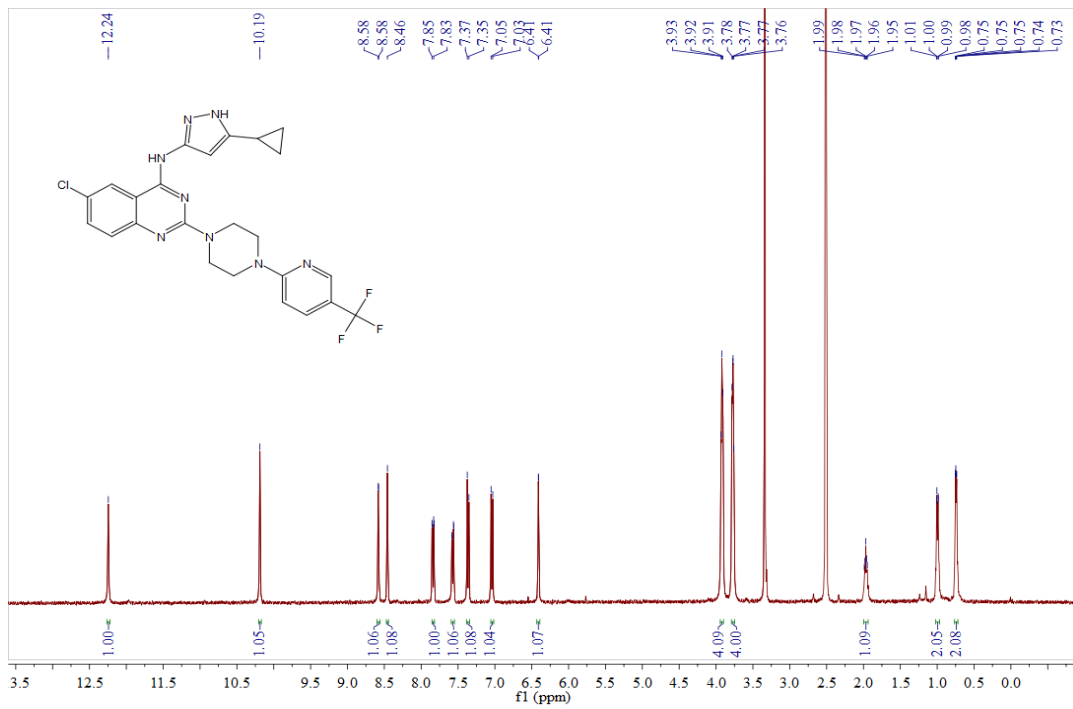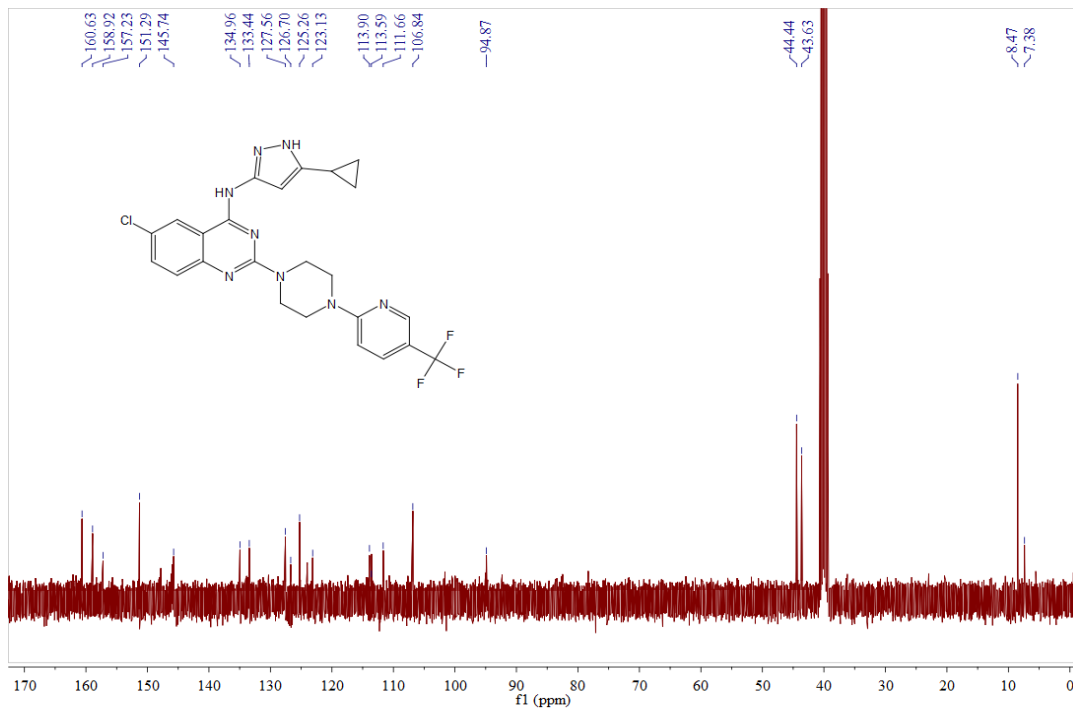



## User Spectra

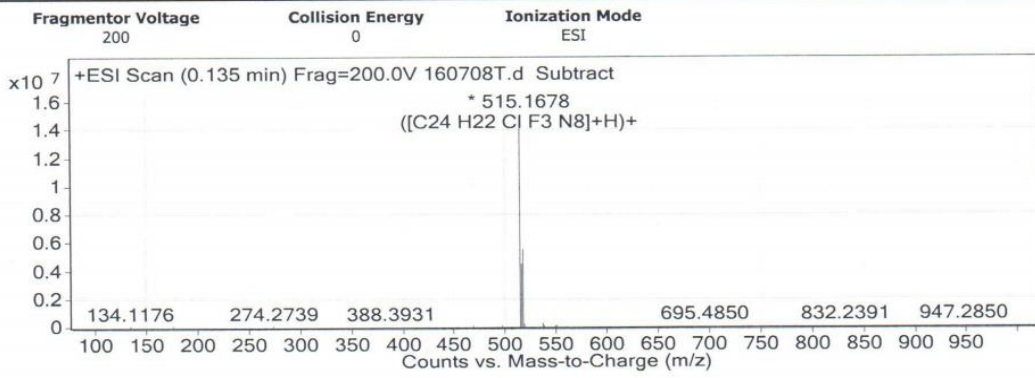

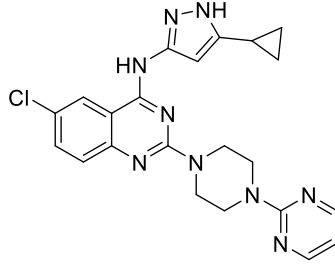

Compound 9a

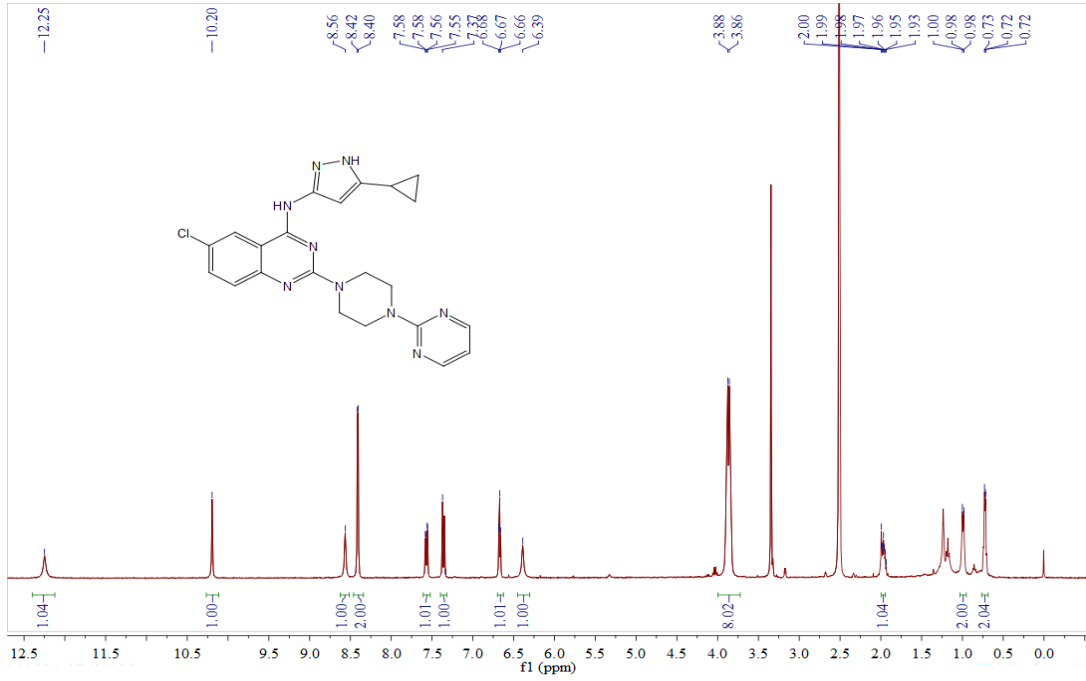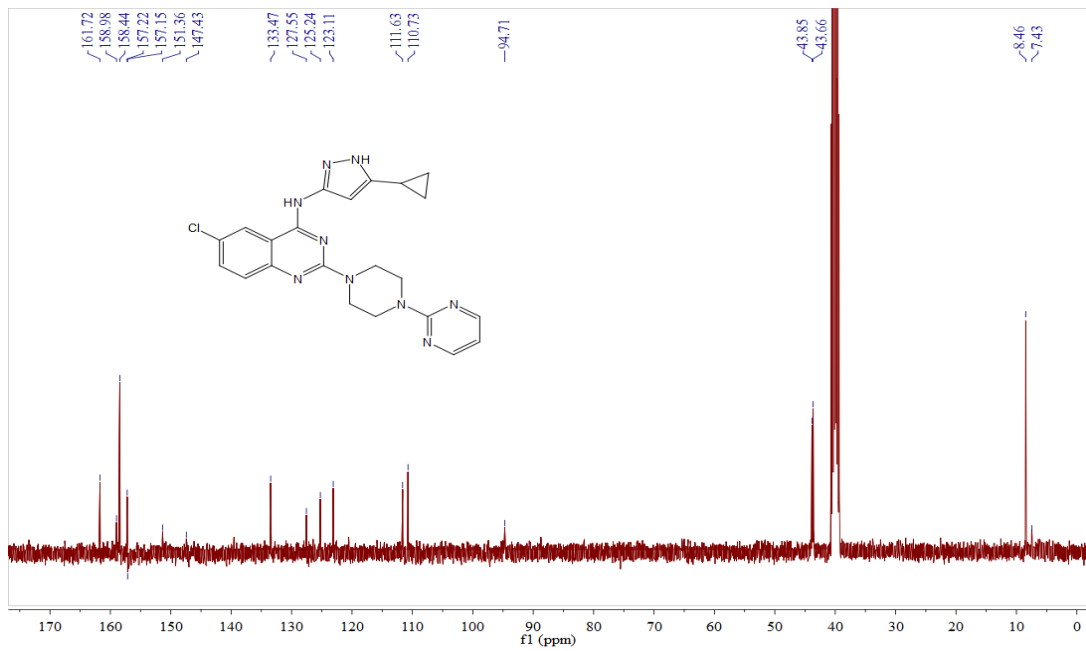

## User Spectra

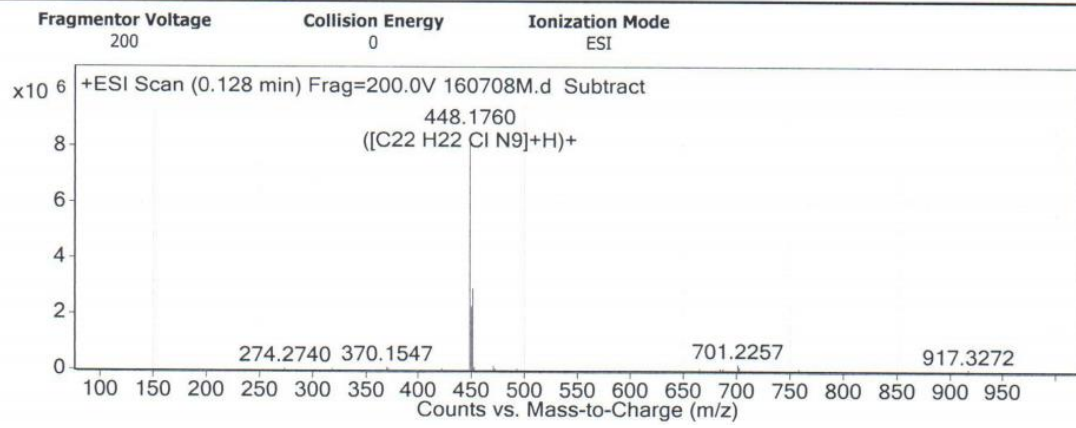

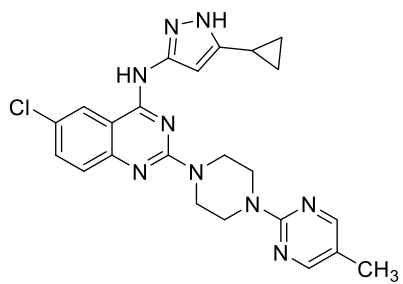

Compound **9b**

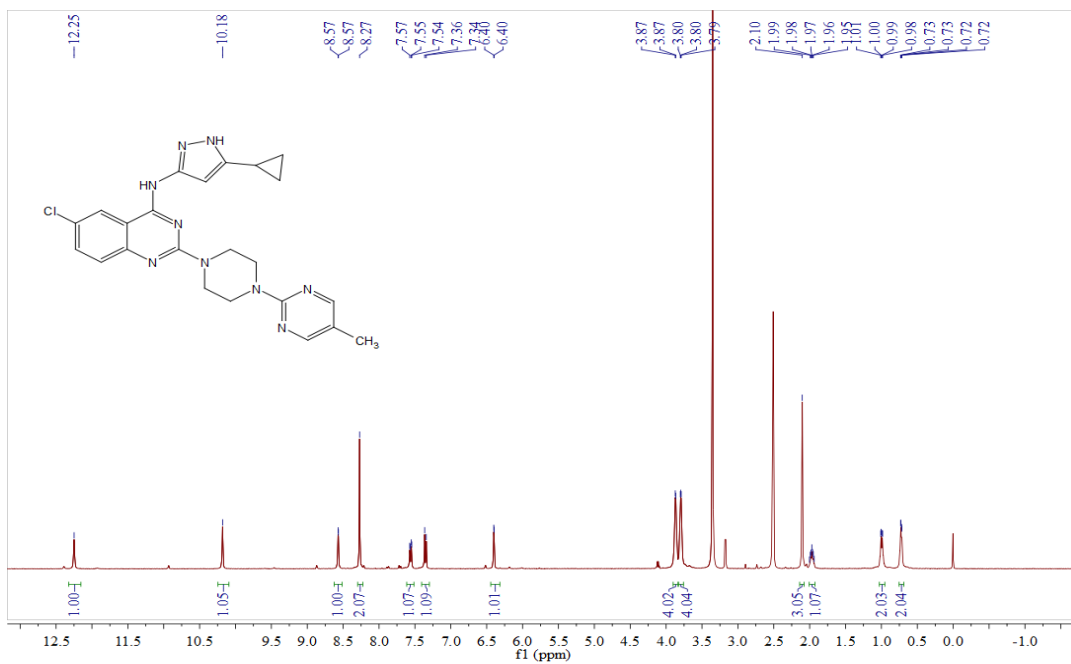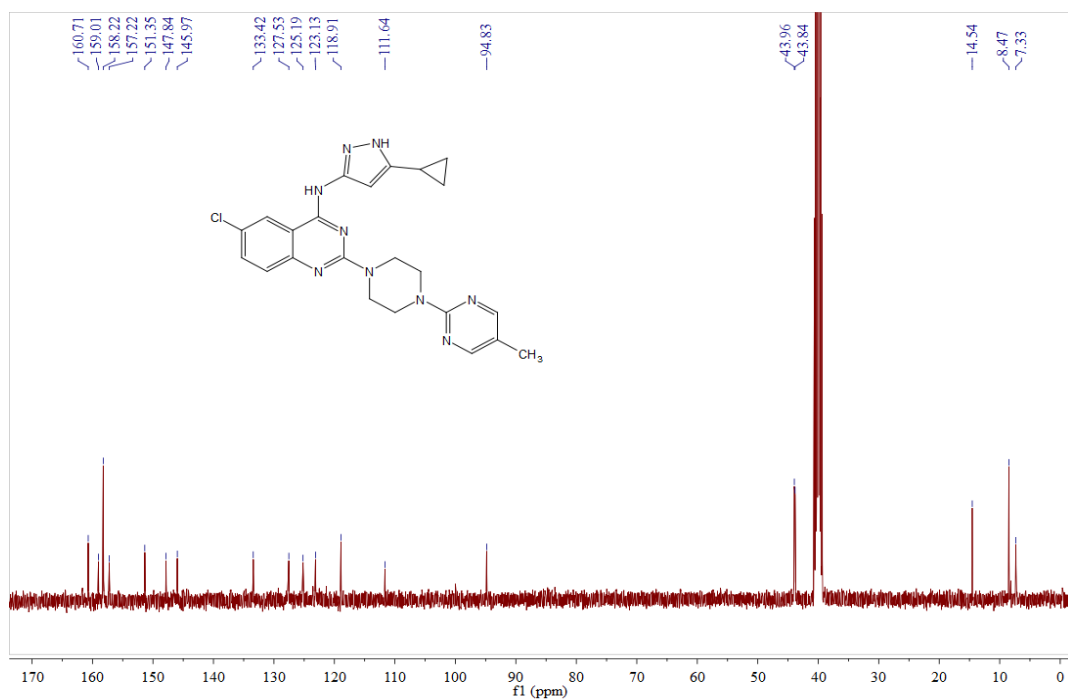

## User Spectra

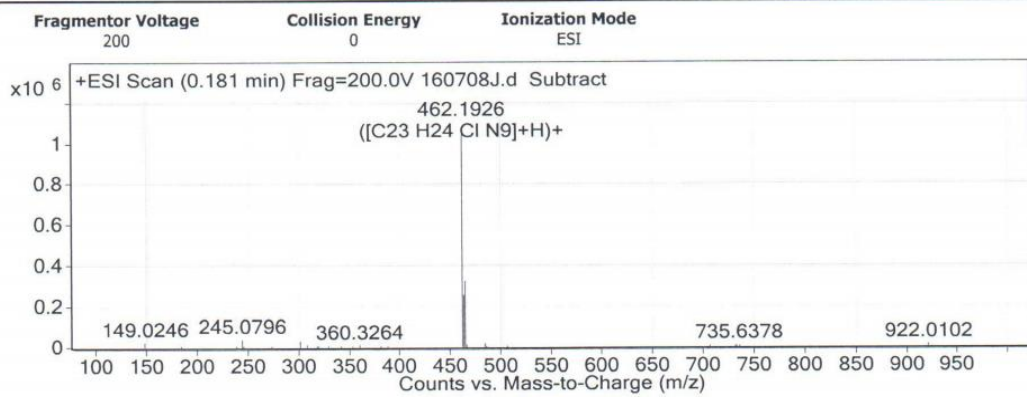

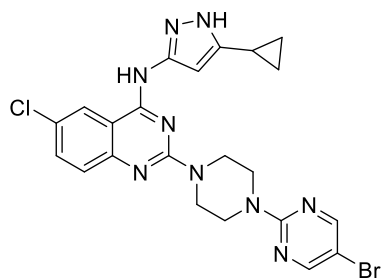

Compound 9c

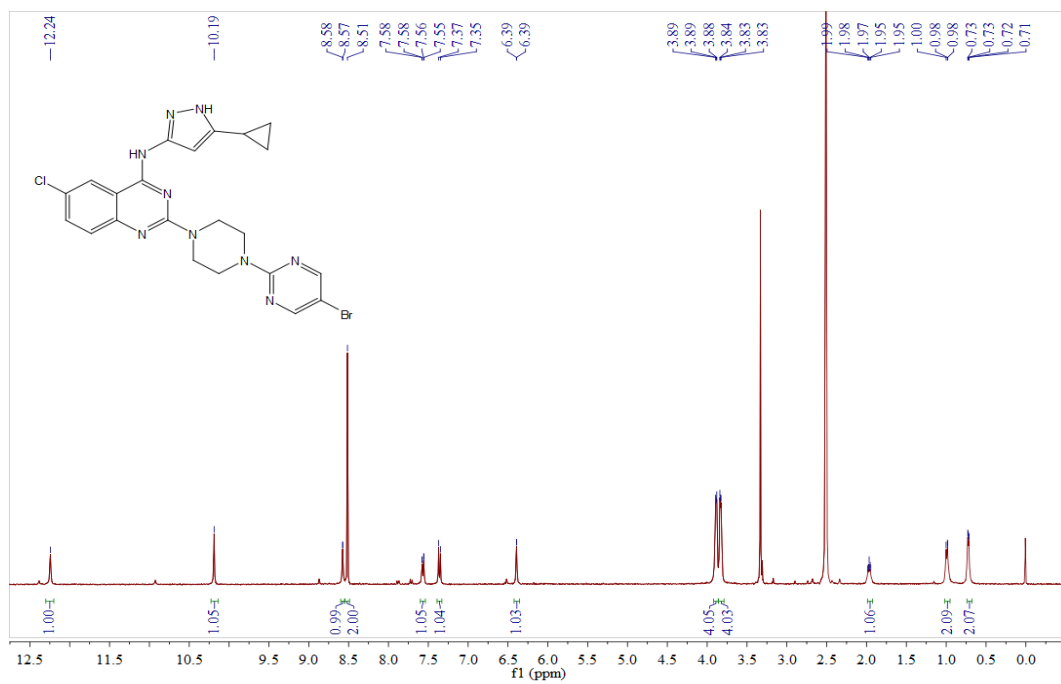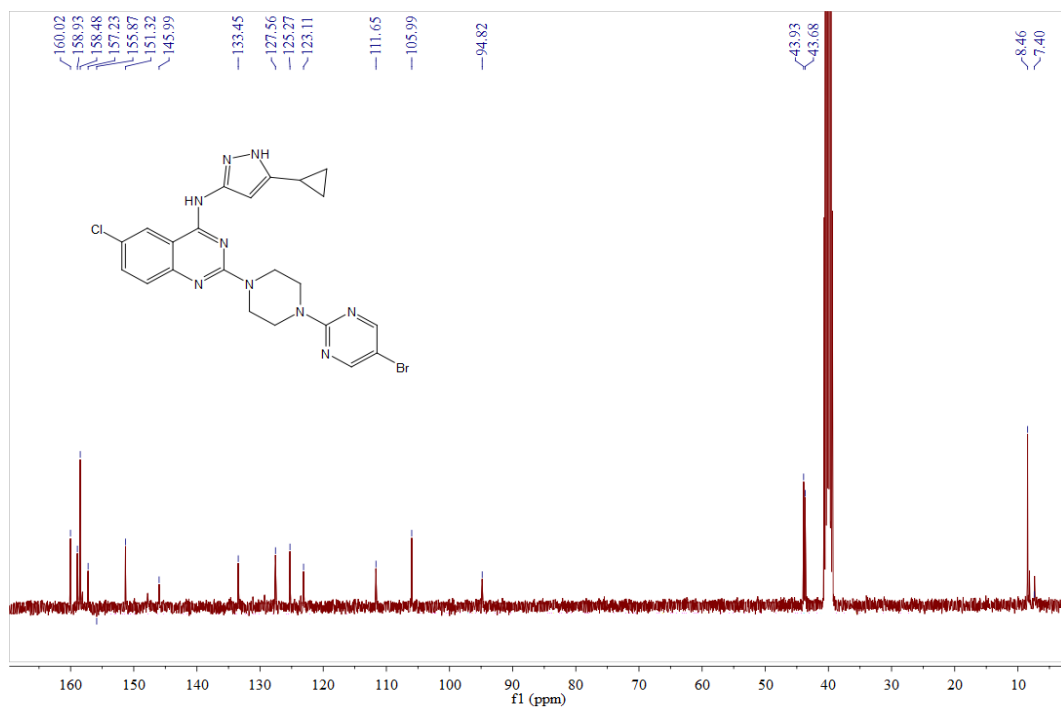

## User Spectra

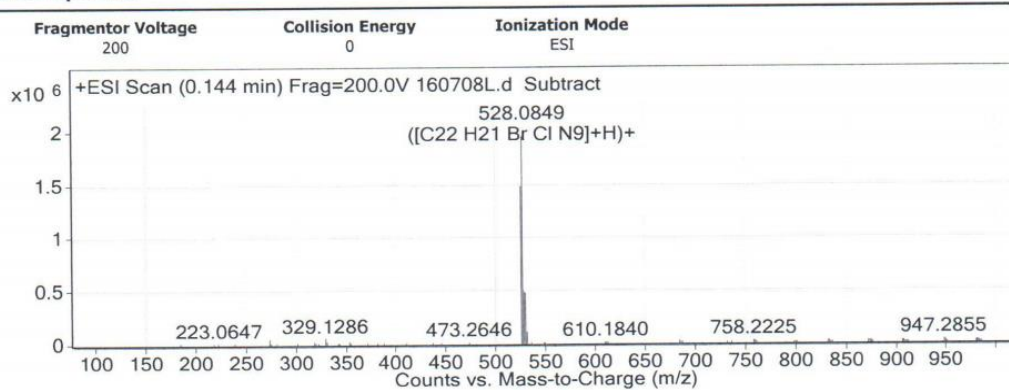

Supplement: molecules-23-00417-s001.pdf [file molecules-23-00417-s001.pdf]
